# 1 Tissue specific targeting of DNA nanodevices in a multicellular living organism.

2 Kasturi Chakraborty<sup>1,2</sup>, Sunaina Surana<sup>1,2</sup>, Simona Martin<sup>1,2</sup>, Jihad Aburas<sup>3</sup>, Sandrine  
3 Moutel<sup>4</sup>, Franck Perez<sup>4</sup>, Sandhya P. Koushika<sup>5</sup>, Paschalis Kratsios<sup>2,3,\*</sup> and Yamuna  
4 Krishnan<sup>1,2,\*</sup>

5 <sup>1</sup>*Department of Chemistry, The University of Chicago, Chicago IL 60637*

6 <sup>2</sup>*Grossman Institute of Neuroscience, Quantitative Biology and Human Behavior, The*  
7 *University of Chicago, Chicago IL 60637*

8 <sup>3</sup>*Department of Neurobiology, The University of Chicago, Chicago IL 60637*

9 <sup>4</sup>*Dynamics of Intracellular Organization Laboratory, Institut Curie, PSL Research University,*  
10 *Sorbonne Université, Centre National de la Recherche Scientifique, UMR 144, Paris, France*

11 <sup>5</sup>*Department of Biological Sciences, Tata Institute of Fundamental Research, Mumbai, India*

12

## 13 Abstract

14 Nucleic acid nanodevices present great potential as agents for logic-based therapeutic  
15 intervention as well as in basic biology. Often, however, the disease targets that need  
16 corrective action are localized in specific organs and thus realizing the full potential of DNA  
17 nanodevices also requires ways to target them to specific cell-types *in vivo*. Here we show that  
18 by exploiting either endogenous or synthetic receptor-ligand interactions and by leveraging the  
19 biological barriers presented by the organism, we can target extraneously introduced DNA  
20 nanodevices to specific cell types in *C. elegans*, with sub-cellular precision. The amenability  
21 of DNA nanostructures to tissue-specific targeting *in vivo* significantly expands their utility in  
22 biomedical applications and discovery biology.

23

## 24 Introduction

25 DNA has proven to be a versatile molecular scaffold to build an array of programmable  
26 synthetic nanoarchitectures due to its structural predictability(Seeman & Sleiman, 2017). The  
27 specificity of Watson-Crick base pairing, its tuneable affinity, the well-defined structural  
28 properties of the double helix and its modular nature make the DNA scaffold highly  
29 engineerable. A wide array of functional DNA-based nanodevices have been deployed *in vivo*  
30 both for quantitative chemical imaging and also as programmable carriers that deliver  
31 encapsulated cargo upon receipt of a molecular cue(Chakraborty, Leung, & Krishnan, 2017;  
32 Chakraborty, Veetil, Jaffrey, & Krishnan, 2016; Douglas, Bachelet, & Church, 2012; Jani, Zou,  
33 Veetil, & Krishnan, 2020; Krishnan & Bathe, 2012; Lee et al., 2012; J. Li et al., 2011; Modi et  
34 al., 2009; Narayanaswamy et al., 2019; Saha, Prakash, Halder, Chakraborty, & Krishnan,  
35 2015; Sharma, Zaveri, Visweswariah, & Krishnan, 2014; Surana, Bhat, Koushika, & Krishnan,  
36 2011; Thekkan et al., 2019; Veetil et al., 2017; Zhao et al., 2012). However, in most contexts,  
37 the site for payload action ideally needs to be confined to the desired organ or tissue. Thus, if

38 DNA nanodevices can be targeted tissue-specifically in a live, multicellular organism, it would  
39 significantly expand their potential utility in biomedicine and fundamental biology.

40 Nature solves the problem of transporting poorly permeable molecules across  
41 membrane barriers, either releasing or enriching them tissue-specifically, by membrane  
42 trafficking. DNA nanostructures are particularly amenable to endosomal trafficking, which has  
43 in part, led to an array of synthetic DNA nanostructures being presently deployed in living  
44 systems(Bujold, Lacroix, & Sleiman, 2018; Chakraborty et al., 2016; Krishnan, Zou, & Jani,  
45 2020). Endosomal trafficking is ubiquitous: it regulates the internalisation, sorting and  
46 intracellular transport of diverse cargo, and is pivotal to development, signalling and  
47 homeostasis. The significance and impact of endocytosis in health and disease is underscored  
48 by the observation that perturbations in endosomal trafficking are linked to multiple diseases,  
49 including neurodegeneration, cancer and cardiovascular disease and further, distinct cell types  
50 differ in their susceptibility to disease(Maxfield, 2014; Mellman & Yarden, 2013; Mukherjee,  
51 Ghosh, & Maxfield, 1997). By leveraging membrane trafficking as well as taking advantage of  
52 biological barriers present in the whole organism, we show that DNA nanodevices can be  
53 targeted tissue-specifically and with organelle-level precision in the nematode *Caenorhabditis*  
54 *elegans*.

55 Most studies that use DNA nanostructures as reporters or payload carriers describe  
56 their functionality primarily in cultured cells that express scavenger receptors for which DNA is  
57 the natural ligand(J. Li et al., 2011; Modi et al., 2009). *In vivo* studies in multicellular organisms  
58 have also exploited scavenger receptor-mediated endocytosis to target DNA architectures to  
59 phagocytic cells such as coelomocytes in *C. elegans*(Surana et al., 2011) or microglia in *D.*  
60 *rerio*(Veetil et al., 2020) (**Figure 1a**). However, since most cells and tissues do not  
61 endogenously express, scavenger receptors, targeting DNA nanostructures to such cell types  
62 *in vivo* remains challenging. In cultured cells, this problem is circumvented by exploiting  
63 naturally occurring receptor-ligand interactions. The natural ligand is chemically conjugated to  
64 a DNA nanodevice, which then binds its cognate receptor on the cell surface and gets  
65 internalized and transported within the cell along the trafficking route adopted by the  
66 receptor(Bhatia et al., 2016; Jani et al., 2020; Modi, Nizak, Surana, Halder, & Krishnan, 2013).  
67 Alternately, a synthetic receptor-ligand interaction has been used where the receptor is a  
68 sequence-specific, DNA-binding protein based on a single-chain variable fragment  
69 (scFv)(Modi et al., 2013). When the scFv is fused to a trafficking protein such as furin, and the  
70 chimera is expressed in cells, furin displays the synthetic scFv receptor on the cell surface.  
71 Thus, DNA nanodevices with an scFv-binding sequence engage the scFv domain of the  
72 chimera and get trafficked to specific organelles within the cell(Modí et al., 2013; Saminathan  
73 et al., 2020). Despite these *in cellulo* demonstrations, there is still no evidence that DNA  
74 nanostructures can be targeted to tissues lacking scavenger receptors in multicellular

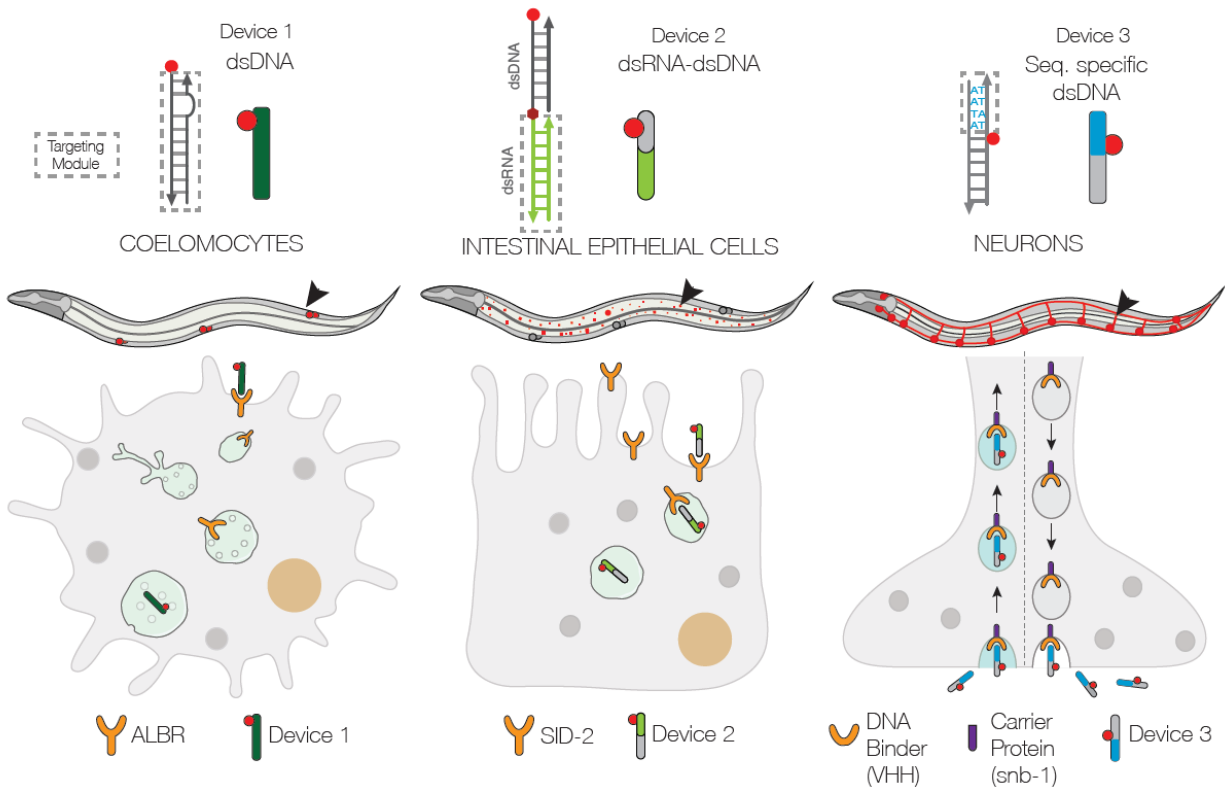

**Figure 1: Schematic of strategies to target DNA devices to different cell types:** (A) DNA nanodevices are intrinsically targeted to coelomocytes via the endogenously expressed scavenger receptors. (B) DNA nanodevices that display a dsRNA (green) domain are targeted to intestinal epithelial cells by engaging endogenously expressed SID-2 receptor. (C) DNA nanodevices are targeted selectively to those neurons that express a DNA-binding protein (V<sub>HH</sub>) fused to synaptobrevin (*snb-1*). The DNA nanodevice has a sequence (blue) recognized specifically by V<sub>HH</sub>.

75 organisms.

76 In this study, we demonstrate that DNA nanodevices can be targeted tissue-  
77 specifically in the nematode *C. elegans* by leveraging both natural and synthetic receptors, on  
78 the surface of different cell types. We have focussed on two tissues where endosomal  
79 trafficking has been linked to critical physiological functions, namely, the intestine and the  
80 nervous system. In the first instance, we exploit the presence of endogenous SID-2 receptors  
81 on the intestine to target a DNA nanostructure along the endo-lysosomal pathway in intestinal  
82 epithelial cells (**Figure 1b**). In the second, we present a generalizable route to target DNA  
83 nanostructures to cells lacking either scavenger receptors or SID-2 receptors. Here, we use a  
84 synthetic receptor, namely, a newly identified, recombinant, single-domain antibody (9E) which  
85 tightly binds a specific 4-nt sequence of dsDNA. When 9E is fused to the synaptic vesicle  
86 protein synaptobrevin-1 (SNB-1) and selectively expressed in neurons, the SNB-1::9E chimera  
87 binds DNA nanodevices having the cognate 4-nt domain and localizes them in retrogradely-  
88 moving endosomes in neurons (**Figure 1c**).

89 By leveraging the *C. elegans* amenability to transgenesis, we demonstrate the  
90 molecular adaptability of this strategy. By expressing SNB-1::9E under promoters expressing  
91 in specific sets of neurons, we show that DNA nanodevices can be targeted to retrogradely-  
92 moving endosomes in specific neurons. We then demonstrate sub-cellular control over  
93 targeting afforded by this synthetic system. We show that DNA nanodevices can be displayed  
94 on the neuronal surface without invoking their entry into organelles. When 9E is genetically  
95 fused to the transmembrane odorant receptor ODR-2 and expressed under a neuron-specific  
96 promoter, it binds and positions a DNA nanodevice on the neuronal surface. The small size,  
97 stability and pH-insensitivity of 9E makes this two-component system immediately suitable for  
98 a multitude of DNA architectures bearing the cognate 4-nt sequence. Moreover, it offers a  
99 versatile route to target diverse proteins or track endosomal transport trajectories in different  
100 cell types *in vivo*, especially in model organisms amenable to transgenesis.

101

## 102 **Results and Discussion**

### 103 **Targeting DNA nanodevices to intestinal epithelial cells**

104 The intestine is one of the major organs of *C. elegans*, comprising a third of the total  
105 somatic mass with twenty large epithelial cells positioned with bilateral symmetry, forming a  
106 long tube around a lumen<sup>(McGhee, 2007)</sup>.(Altun & Hall, 2009). Intestinal epithelial cells (IECs)  
107 contain prominent, birefringent gut granules that are known as lysosome-related organelles  
108 (LROs). Distinguished by lysosomal markers(Coburn & Gems, 2013; Dell'Angelica, Mullins,  
109 Caplan, & Bonifacino, 2000; Hermann et al., 2005), LROs play important roles in production  
110 and storage of melanin, immune defence and neurological function(Huizing, Helip-Wooley,

111 Westbroek, Gunay-Aygun, & Gahl, 2008). We first sought to target a simple DNA nanodevice  
112 comprising a 38-bp double stranded DNA (dsDNA) bearing a 5' Alexa 647 (A647), denoted  
113  $D^{38}$ , to label LROs in the intestinal epithelia (**Table 1, Supplementary Information**). We  
114 reasoned that the biological barrier between the intestinal lumen and the pseudocoelom would  
115 effectively preclude  $D^{38}$  from access to coelomocytes, as seen whenever DNA nanodevices  
116 are microinjected in the pseudocoelom<sup>(Bhatia, Surana, Chakraborty, Koushika, & Krishnan, 2011; Surana et al., 2011)</sup>.

117 We therefore utilized a liquid-feeding method to introduce 1  $\mu$ M of  $D^{38}$  into the intestinal  
118 lumen of one-day adult worms (M&M). We leveraged the high autofluorescence of LROs at  
119 shorter wavelengths to provided regions of interest (ROIs) to evaluate the efficacy of  $D^{38}$   
120 uptake. The mean intensity corresponding to  $D^{38}$  uptake, compared to control mock-fed worms,  
121 was very low, indicating low or no intrinsic targetability of DNA nanodevices to IECs. (**Figure**  
122 **2a-b**). We therefore varied the size of the DNA nanodevice to test whether increasing the  
123 number of base pairs (bp) and/or negative charges improved targeting, the sequences of which  
124 are shown in **Table 1, Supplementary Information**. Using the same liquid-feeding method,  
125 we repeated uptake experiments with 50 or 100 bp long dsDNA ( $D^{50}$  or  $D^{100}$ ). Again, there was  
126 no enhancement in nanodevice targeting to IECs (**Figure 2a**). This revealed DNA  
127 nanostructures are not inherently targeted to cells in this tissue.

128 We then tested whether we could co-opt the RNA interference (RNAi) pathway in order  
129 to target DNA-based probes to intestinal epithelia. Previous studies have shown that worms  
130 are capable of endocytosing dsRNA localized in the acidic intestinal lumen, and that this is  
131 effected by the membrane protein SID-2(Hunter et al., 2006; McEwan, Weisman, & Hunter,  
132 2012; William M Winston, Sutherlin, Wright, Feinberg, & Hunter, 2007). We first tested the  
133 uptake of dsRNAs either 50 bp or 100 bp long, denoted  $R^{50}$  or  $R^{100}$  respectively, based on  
134 previous work suggesting this as the minimum length needed for effective internalisation by  
135 SID-2 (**Figure 2a**)(McEwan et al., 2012)All dsRNAs carried a fluorescent Alexa647 label at  
136 their 5' termini. Interestingly, when worms were liquid-fed either  $R^{100}$  or  $R^{50}$  we observed that  
137 uptake efficiency by intestinal epithelia increased ~2-fold compared to their DNA analogues  
138 (**Figure 2b**).

139 We therefore sought to test whether covalently attaching  $R^{100}$  or  $R^{50}$  to a DNA  
140 nanodevice would promote nanodevice entry into the intestinal epithelia via the SID-2 receptor,  
141 and potentially label LROs. Using click chemistry, we conjugated  $R^{100}$  to DNA nanodevices  
142  $D^{38}$ ,  $D^{50}$  or  $D^{100}$  bearing Alexa647 labels to give chimeric RNA-DNA nanodevices denoted  
143  $R^{100}D^{38}$ ,  $R^{100}D^{50}$  and  $R^{100}D^{100}$  respectively (**Figure 2c-d, Supplementary Fig 1**)(Jewett,  
144 Sletten, & Bertozzi, 2010). When nematodes were liquid-fed the above chimeras and then  
145 imaged, we found that overall, conjugating  $R^{100}$  to DNA nanodevices improved uptake of the  
146 latter by intestinal epithelial cells. However, interestingly, we observed that the length of the

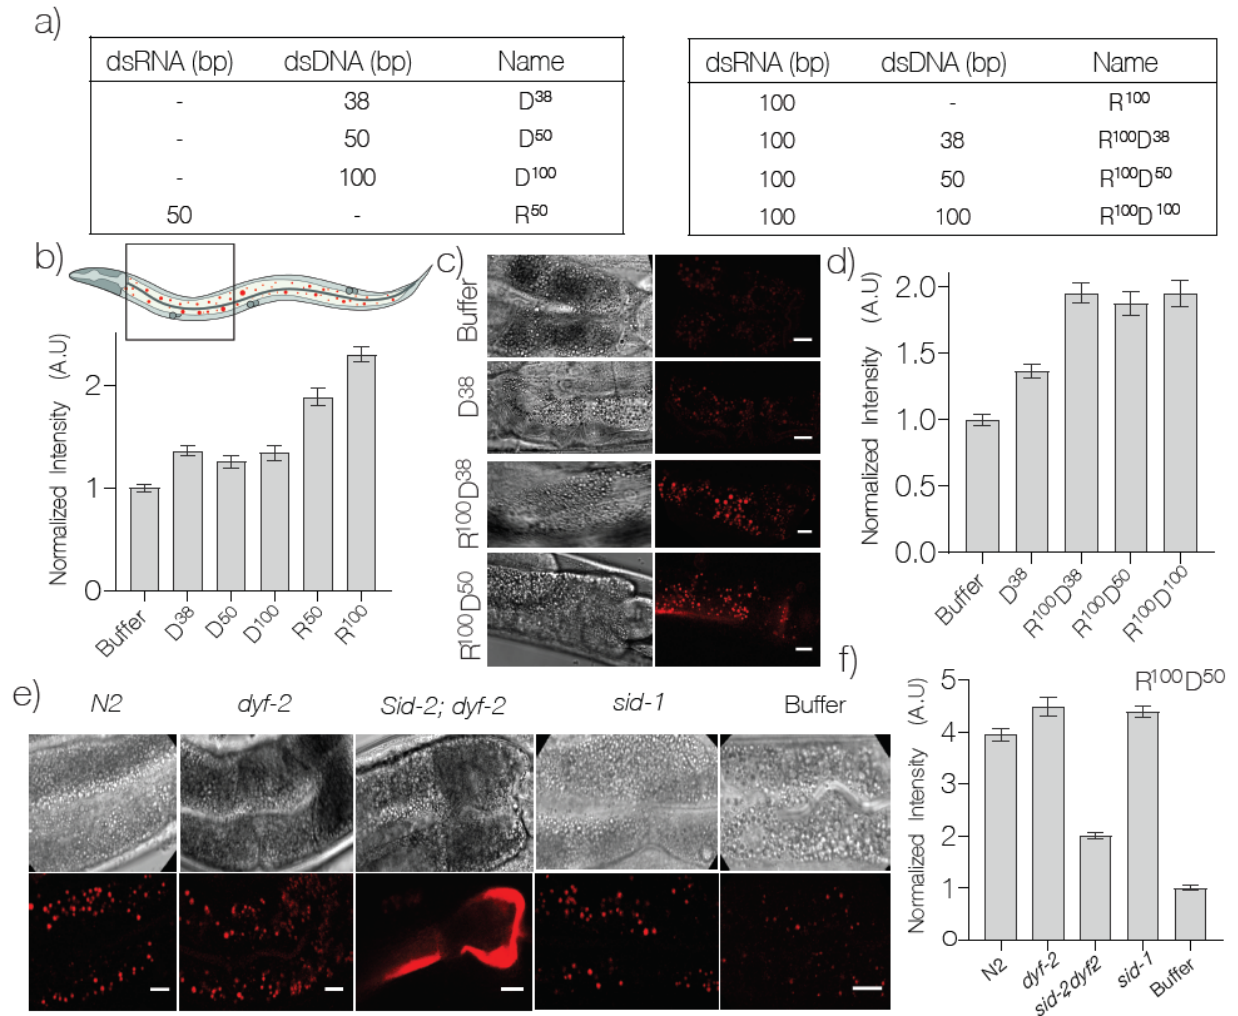

**Figure 2: DNA nanodevices are targeted to intestinal epithelial cells.** a) Table of the composition and length of the various Alexa-647 labeled DNA nanodevices used. B) Mean Alexa647 fluorescence intensity of corresponding to the uptake of the indicated nanodevice in *C. elegans* intestinal epithelial cells (IECs). c) Representative fluorescence and DIC images of IECs labelled with the indicated R<sup>100</sup>-conjugated nanodevice quantified in d). e) Representative fluorescence images of IECs labelled with nanodevice R<sup>100</sup>D<sup>50</sup> in the indicated genetic background quantified in g). Data represented as mean  $\pm$  standard error of the mean of 10 worms,  $\sim$ 500 endosomes. The four IECs closest to the pharynx were considered for quantification. Scale bar = 10  $\mu$ m

147 dsDNA scaffold had no significant effect on uptake efficiency (**Figure 2d-e**). Thus, it is possible  
148 to target DNA nanodevices to intestinal epithelial cells using a DNA-RNA chimera.

149 Closer scrutiny revealed that R<sup>100D<sup>n</sup></sup> nanodevices internalized by intestinal epithelia  
150 localized to lysosome related organelles (LROs), readily identified by their high  
151 autofluorescence at low wavelengths(Soukas, Carr, & Ruvkun, 2013), as well as colocalization  
152 with LAMP-1::GFP and GLO::1-GFP (**Supplementary Fig 1**)(Schroeder et al., 2007; Soukas  
153 et al., 2013). In order to confirm the identity of the receptor responsible for the uptake of the  
154 chimeric nanodevices into LROs, we repeated uptake assays in worms carrying mutant alleles  
155 for *sid-1* and *sid-2*, two critical players of the RNAi pathway. Homozygous animals for the *sid-*  
156 *1(qt9)* null allele are systemically resistant to RNAi(W M Winston, Molodowitch, & Hunter,  
157 2002). The *sid-2* locus is embedded within an intron of another gene (*dyf-2*) and the only  
158 available strong loss-of-function allele (*gk505*) for *sid-2* contains a 403 bp deletion, which  
159 removes the first *sid-2* exon and the twelfth *dyf-2* exon. As a control for the *sid-2&dyf-2(gk505)*  
160 strain, we used animals carrying the *dyf-2(gk678)* mutant allele that selectively disrupts the  
161 *dyf-2* gene alone. Wild-type (N2 strain), *dyf-2*, *sid-1*, and *sid-2&dyf-2* worms were tested for  
162 their ability to uptake R<sup>100D<sup>50</sup></sup> as previously described (**Figure 2d-e**). We found that uptake was  
163 reduced in *sid-2&dyf-2* mutants, but not in *sid-1(qt9)*, *dyf-2(gk678)* or wild-type worms. Our  
164 results are consistent with SID-2 being localized on the extracellular surface, acting as a  
165 receptor that binds and endocytoses dsRNA, while SID-1 is resident in endosomes, where it  
166 binds dsRNA cargo and transports it into the cytosol(Jose & Hunter, 2007; W. Li, Koutmou,  
167 Leahy, & Li, 2015; McEwan et al., 2012). This implicates SID-2 as the receptor for nanodevice  
168 internalisation and its subsequent trafficking to LROs in intestinal epithelial cells.

169

## 170 **Development of a DNA binding, recombinant camelid antibody**

171 *C. elegans* has proven to be a powerful model organism to study vesicular trafficking  
172 in neurons, given its transparent body and simple nervous system(Hulme & Whitesides, 2011;  
173 Teschendorf & Link, 2009). However, neurons do not express either scavenger receptors or  
174 SID proteins, complicating the targeting of DNA nanodevices to these cell types. We therefore  
175 developed a DNA-binding recombinant, camelid antibody (V<sub>H</sub>H) as a synthetic receptor for  
176 DNA nanodevices. This offers the advantage of tagging endogenously expressed proteins in  
177 any cell of choice rather than ectopically expressing canonical DNA-binding proteins that could  
178 have unknown biological effects. The small size of camelid antibodies, the ability to select them  
179 by display technologies and tune their affinity, stability, and expression by molecular evolution  
180 have led to a plethora of *in vivo* applications(Antibodies, Phage, & Technology, 1994). Camelid  
181 antibodies lack a light chain altogether and the heavy chain domain itself is sufficient to form  
182 the antigen binding pocket(Hamers-Casterman et al., 1993), leading to their utility in  
183 therapeutics as well as cell biology(Harmsen & De Haard, 2007). They robustly maintain their

184 native conformations due to increased hydrophilicity and single domain nature and are much  
185 more resistant to thermal and chemical denaturation(Dumoulin et al., 2002; Ewert, Cambillau,  
186 Conrath, & Plückthun, 2002; Pérez et al., 2001; van der Linden et al., 1999).

187 We screened a recombinant llama antibody library to isolate high affinity candidates  
188 that bind a specific DNA duplex and characterized the binding *in vitro*<sup>5</sup>. After a phage display  
189 screen, we studied 160 potential binders and selected one of the highest affinity binders for  
190 further evaluation for its affinity and specificity of binding. This binder, 9E, was further tested  
191 for its expression, pH dependence and binding affinity. To date, V<sub>H</sub>H recombinant antibodies  
192 have been obtained using phage display against many classes of molecules, but not against  
193 nucleic acids.

194 We therefore developed an assay to screen recombinant camelid antibodies by phage  
195 display against a 41 bp dsDNA to obtain high-affinity, sequence-specific DNA binding  
196 antibodies (**Materials and Methods**). The 41 bp dsDNA target was immobilized on streptavidin  
197 coated magnetic beads via a 5' biotinylated terminus and presented as the epitope to the V<sub>H</sub>H  
198 library (**Figure 3a**). Following standard procedure with the variations described above, three  
199 rounds of progressive selection and amplification enriched for putative dsDNA binders. Next,  
200 160 clones, were randomly selected, grown in 96 well plates and the corresponding phage  
201 bound V<sub>H</sub>H antibodies were expressed and screened for dsDNA binders. Nearly 70%  
202 displayed DNA binding properties, of which 40 bound DNA regardless of whether it was  
203 double- or single-stranded. Interestingly, 42 were found to show sequence specificity for the  
204 dsDNA target and showed minimal binding to ssDNA of the same sequence or dsDNA with a  
205 different sequence. These 42 clones were taken forwards for further analysis (**Supplementary**  
206 **Figure 2**).

207 To screen for the minimal dsDNA motif recognized by each of the selected V<sub>H</sub>H  
208 antibody clones, ELISA was performed against a set of immobilized dsDNAs. These  
209 corresponded to the full 41-mer dsDNA target and three shorter dsDNA regions R<sub>1</sub>, R<sub>2</sub> and R<sub>M</sub>  
210 on the target (**Figure 3b**). Region R<sub>1</sub> corresponded to a 17 bp region at the 3' terminus of the  
211 biotinylated ssDNA oligonucleotide (nucleotides in red and blue font), R<sub>2</sub> corresponded to a 17  
212 bp region on the 5' end of the oligonucleotide (nucleotides in green font), while R<sub>M</sub>  
213 corresponded to a 17 bp overlapping the 5' end of R<sub>1</sub> and the 3' of R<sub>2</sub> shown in italics. Of the  
214 42-dsDNA binding V<sub>H</sub>H antibodies tested, nearly 80% specifically bound region R<sub>1</sub>, albeit with  
215 varying affinities (**Supplementary Figure 3**).

216 To pinpoint the epitope on the 17-bp region R<sub>1</sub>, partial duplexes were tested covering this  
217 region with a sliding window of 4 bp from the 3' end of the biotinylated oligonucleotide to form  
218 dsDNAs R<sub>3</sub> and R<sub>6</sub> (**Figure 3b**). This strategy ensured that the epitope could be narrowed  
219 down to at least 4 bp. ELISAs revealed that each of the 42 V<sub>H</sub>H antibodies required only the  
220 first 4 bp at the 3' end of region R<sub>1</sub> (ATAA, nucleotides in red) for binding (**Figure 3c**). When



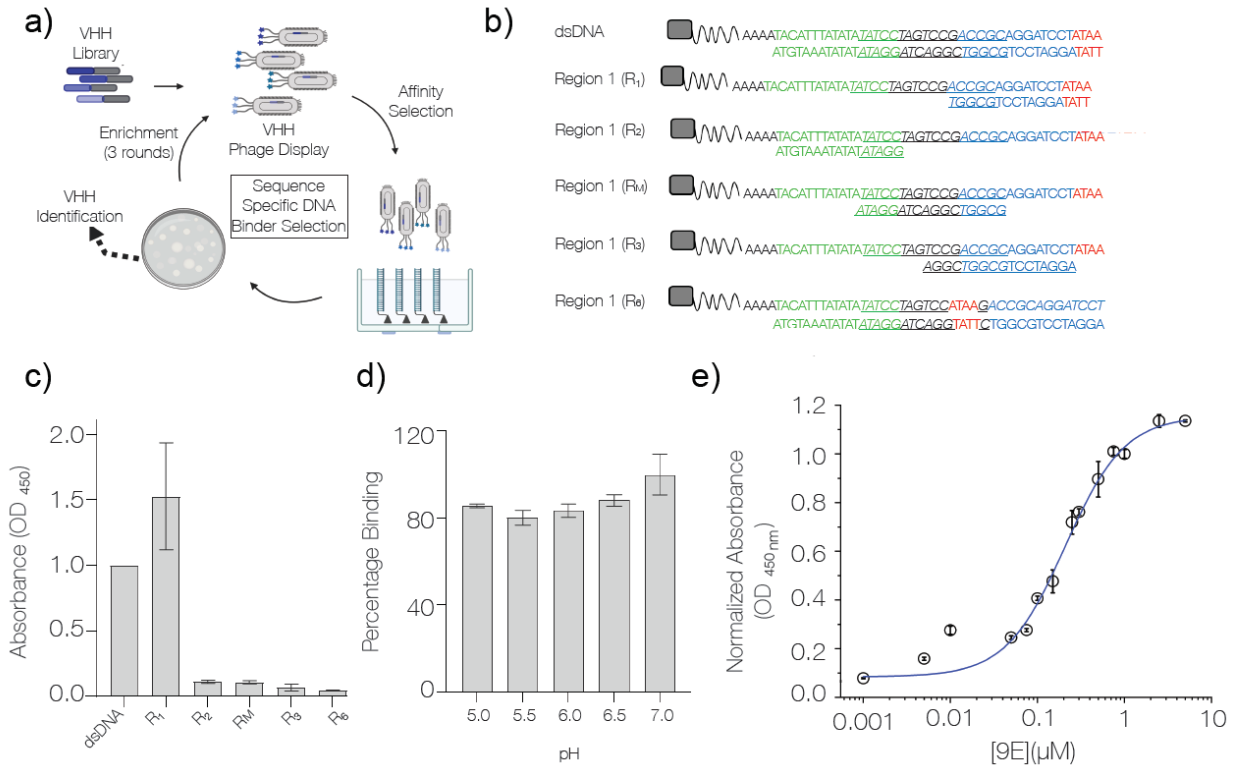

**Figure3: Identification and characterization of a sequence-specific DNA-binding recombinant antibody 9E.** a) Schematic of phage display screen to identify DNA binders using a camelid antibody (V<sub>H</sub>H) library b) Sequence of the various dsDNA epitopes used to pinpoint the dsDNA sequence bound by the recombinant antibody, 9E. The tested regions are R1 (blue and red), R2 (green), an overlapping region RM (italicized and underlined), R3 (region R1 frame-shifted by a window of 4 nts) and R6 (4-nt motif in red, present in the middle of the DNA duplex). Biotin (grey square) was incorporated to immobilize the DNA epitopes on streptavidin-coated magnetic beads. c) Binding efficiencies of the recombinant antibody 9E with the indicated dsDNA constructs as determined by ELISA. d) Effect of pH on binding efficiency of 9E with dsDNA as determined by ELISA. e) The relative binding constant of 9E and dsDNA epitope in solution. Serial dilutions of the purified protein were added to a fixed amount of immobilized dsDNA (25 pmoles). All experiments were performed in triplicate and the data is represented as mean ± s.e.m.

221 this 4 bp sequence is present not at the terminus, but in the middle of the dsDNA duplex, as  
222 in R<sub>6</sub>, it was no longer a ligand for any of the 42 V<sub>H</sub>H antibodies. This clearly demonstrated  
223 that the minimal binding epitope for all 42 V<sub>H</sub>H antibodies isolated was a terminal d(ATAA)  
224 motif (**Supplementary Figure 3**). Furthermore, since endocytic events are accompanied by  
225 luminal pH changes, it is crucial to test whether binding between the V<sub>H</sub>H antibody to its  
226 cognate DNA epitope is pH-independent. From a pH-dependent ELISA screen we identified  
227 that the V<sub>H</sub>H 9E was disrupted the least of all by acidification, demonstrating ~82% binding  
228 even at pH 5.0. (**Figure 3d, Supplementary Figure 4**). Finally, based on ELISA, we estimated  
229 that the relative binding affinity of V<sub>H</sub>H 9E to its target epitope was ~200 nM (**Figure 3e,**  
230 **Materials and Methods**). Cumulatively, our findings show that the recombinant camelid  
231 antibody V<sub>H</sub>H 9E binds with high specificity to a 3' terminal, d(ATAA) region (**Supplementary**  
232 **Figure 5**).

233

#### 234 **Pan-neuronal expression of the SNB-1::9E chimera in *C. elegans***

235 Next, we tested whether DNA nanodevices could be targeted to neuronal endosomes  
236 by genetically fusing 9E, the DNA-binding V<sub>H</sub>H antibody identified above, with a protein such  
237 as synaptobrevin (SNB-1), that is expressed in neurons and undergoes endosomal trafficking.  
238 Our choice of synaptobrevin as a carrier protein was guided by it being an integral membrane  
239 protein present in multiple copies in synaptic vesicles(Dittman & Ryan, 2009). It has a low  
240 molecular weight (~16 kDa) and its N-terminal cytoplasmic domain interacts with target  
241 membrane SNARE (t-SNARE) proteins to facilitate neurotransmitter exocytosis, while its C-  
242 terminus has a hydrophobic patch that anchors it to vesicular membranes. The C-terminus  
243 ends in a short tail which extends into the vesicular lumen and is exposed to the synaptic cleft  
244 during exocytosis(Hanson, Heuser, & Jahn, 1997; Südhof, 1995). Upon their fusion with the  
245 plasma membrane at the synaptic cleft, synaptic vesicles undergo recycling via the endosomal  
246 pathway(Rizzoli, 2014). Furthermore, fusing GFP (~27 kDa) to the C-terminus of SNB-  
247 1(Murthy, Bhat, & Koushika, 2011; Nonet, 1999), does not perturb SNB-1 localization or  
248 function(Nonet, 1999) (**Figure 1c**).

249 Therefore, we reasoned that neuronal expression of an SNB-1::9E fusion protein would  
250 lead to the 15 kDa V<sub>H</sub>H domain being displayed in the synaptic cleft upon neurotransmitter  
251 release. Thus, if DNA nanodevices bearing a terminal d(ATAA) motif were present in the  
252 pseudocoelom, they could bind the V<sub>H</sub>H domain (blue) of the chimera at the synaptic cleft and  
253 get trafficked retrogradely along the endosomal pathway (**Scheme 1**). We therefore generated  
254 transgenic *C. elegans* animals, denoted *Psnb-1::snb-1::9E* worms, that express the SNB-1::9E  
255 chimera in all neurons under the control of the *snb-1* promoter (*psnb-1*)(Stefanakis, Carrera,  
256 & Hobert, 2015), including an *unc-54* 3' UTR for efficient translation (**Figure 4a-b,**  
257 **Supplementary Figure 6**). Into these worms we injected the DNA nanodevice D<sup>38</sup> (1 μM)

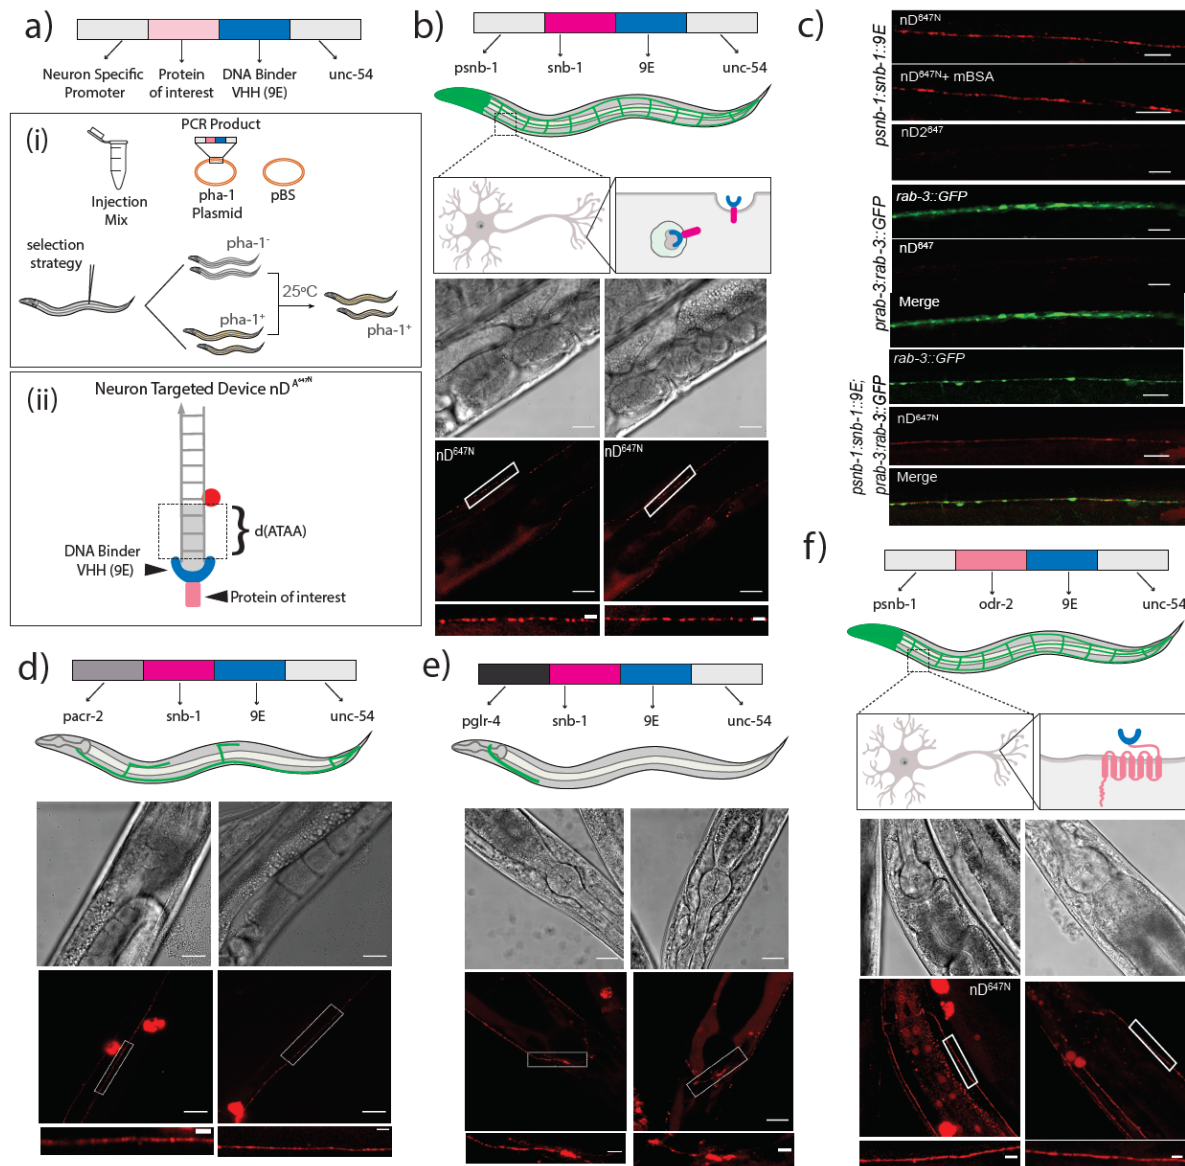

**Figure 4: Targeting DNA nanodevices to neurons** a) Schematic of the constructs used to make transgenics i) Strategy to select transgenics based on *pha-1*<sup>+</sup> worms ii) Schematic of neuron targetable DNA nanodevice nD<sup>A647</sup> bound to its synthetic receptor, 9E, fused to the protein of interest. b) Schematic of nanodevice uptake into neurons of *psnb-1:snb-1::9E* worms. Brightfield and fluorescence images of *C. elegans* neurons labeled with nD<sup>A647</sup>. c) Representative fluorescence images of i) neurons in *psnb1:snb-1::9E* worms injected with nD<sup>A647</sup> in the presence or absence of mBSA and nD2<sup>A647</sup> lacking the 3' terminal d(ATAA) ii) neurons in *prab-3::gfp::rab-3* and iii) *prab-3::gfp::rab-3 ; psnb1:snb-1::9E* expressing *C. elegans* injected with nD<sup>A647</sup>. nD<sup>A647</sup> can be targeted to neuronal subsets. d) nD<sup>A647</sup> labels cholinergic neurons in *pacr-2:snb-1::9E* and glutamergic neurons in e) *pglr-4:snb-1::9E* expressing *C. elegans*. nD<sup>A647</sup> can be targeted via the labeling cassette to other proteins cell-specifically. f) Images of neurons in *psnb1::odr-2::9E* expressing animals labeled with nD<sup>A647</sup>. In all images, the white boxed region is shown in the zoomed image below. Scale: 20 µm; Inset: 5 µm.

258 modified to display a terminal d(ATAA) motif and an Atto 647N fluorophore, now denoted  
259 nD<sup>A647</sup>, into the pseudocoelom and imaged the worms after 30 min. We observed several  
260 punctate structures, linearly arranged along the worm's body strongly resembling neuronal  
261 synapses along the *C. elegans* dorsal and ventral nerve cords (**Figure 4b**).

262 To test whether the nanodevices were in fact labelling neurons and synapses, we performed  
263 a series of colocalization experiments using transgenic *C. elegans* animals carrying different  
264 neuronal and synaptic markers. The strain *otIs355 [rab-3p::2xNLS::tagRFP]* expresses  
265 nuclear RFP pan-neuronally, whereas *otIs45 [unc-119p::GFP]* expresses cytosolic GFP pan-  
266 neuronally (**Supplementary Figure 7**)(*Altun-Gultekin et al., 2001; Nguyen et al., 2016*). The  
267 *jsIs682 [rab-3p::gfp::rab-3]* strain expresses GFP::RAB-3 in most neurons, which is localized  
268 primarily to synaptic regions (**Supplementary Figure 7**)(*Mahoney et al., 2006*).  
269 Hermaphrodites carrying the *Psnb-1:SNB-1::9E* transgene were crossed with each of the  
270 aforementioned reporter strains (**Supplementary Figure 6**). When 500 nM nD<sup>A647</sup> was injected  
271 into *jsIs682 [rab-3p::GFP::RAB-3]; Psnb-1:SNB-1::9E* worms, we found that nD<sup>A647N</sup> labelling  
272 coincides with RAB-3:GFP, confirming synaptic labelling. Interestingly, nD<sup>A647N</sup> containing  
273 puncta do not exclusively colocalize with RAB-3:GFP positive puncta within the same axon.  
274 This suggests that in addition to the synaptic regions of neurons, nD<sup>A647N</sup> might be labelling  
275 retrogradely trafficking endosomal compartments or synaptic vesicles that are being recycled.  
276 Similar colocalization experiments of nD<sup>A647</sup> with other neuronal markers such as *otIs355 [rab-*  
277 *3p::2xNLS::tagRFP]* and *otIs45 [unc-119p::GFP]* further confirmed that nD<sup>A647N</sup> indeed labeled  
278 neurons (**Supplementary Figure 7**).

279 Normally when DNA nanodevices are introduced into the pseudocoelom, they are  
280 taken up by scavenger receptors present on coelomocytes(*Chakraborty et al., 2017; Dan,*  
281 *Veetil, Chakraborty, & Krishnan, 2019; Narayanaswamy et al., 2019; Surana et al., 2011; Veetil*  
282 *et al., 2017*). A key characteristic of nanodevice uptake via this pathway is that uptake is easily  
283 abolished in the presence of 10 equivalent molar excess of maleylated BSA, as the latter  
284 competes for scavenger receptors due to its anionic nature(*Haberland & Fogelman, 1985*).  
285 Importantly, even in the presence of 10 equivalents excess of maleylated BSA, neuronal  
286 labelling of *psnb-1:snb-1::9E* worms with nD<sup>A647</sup> was not affected (**Figure 4c-i**). This indicates  
287 that nD<sup>A647</sup> uptake into neurons does not occur via scavenger receptors. When the terminal  
288 d(ATAA) motif in nD<sup>A647</sup> was removed to give a DNA nanodevice denoted nD2<sup>A647</sup>, we observed  
289 no such neuronal labelling (**Figure 4c-ii**). These results show that DNA nanodevices can be  
290 targeted to neurons in worms only if the former incorporate a d(ATAA) motif, and if the latter  
291 express the SNB-1::9E chimera in neurons.

292

293 **Targeting DNA nanodevices with cellular and subcellular precision**

294 To assess the precision over targeting using our method, we sought to localize DNA  
295 nanodevices in endosomes of specific neuron types. We therefore expressed the SNB-1::9E  
296 chimera under two different neuronal promoters. We focused on the cholinergic subset of  
297 motor neurons since acetylcholine is the most broadly used neurotransmitter in the nematode  
298 nervous system(Pereira et al., 2015). Cholinergic motor neurons in the ventral nerve cord are  
299 divided into six classes: DA, DB, AS, VA, VB, and VC classes(Kerk, Kratsios, Hart, Mourao, &  
300 Hobert, 2017). Since the acetylcholine receptor subunit ACR-2 is expressed in four of the six  
301 classes of cholinergic motor neurons (DA, DB, VA, VB), we used the ACR-2 promoter region  
302 to target these subsets of neurons(Kratsios, Stolfi, Levine, & Hobert, 2011). Transgenic *Pacr-*  
303 *2::snb-1::9E* worms were generated using the previously described *pha-1* strategy (**Figure**  
304 **4a**)(Granato, Schnabel, & Schnabel, 1994). When nD<sup>A647</sup> (1  $\mu$ M) was introduced into the  
305 pseudocoelom of these nematodes, we observed that it localized in several, linearly arranged  
306 punctate structures resembling synapses and/or neuronal endosomes, around the mid-section  
307 of the worm body corresponding to the axons of the VA and VB neurons of the ventral nerve  
308 cord (**Figure 4d**). The DA and DB neurons extend their axons to the dorsal nerve cord and  
309 form synapse with dorsal muscle. However, we did not observe any labelling with nD<sup>A647</sup> in the  
310 dorsal nerve cord of *Pacr-2::SNB-1::9E* worms. Thus, our strategy selectively labels VA and  
311 VB neurons over DA and DB classes of neurons. Such selective labelling could arise from the  
312 differential cell surface levels of SNB-1::9E in VA and VB neurons, or greater accessibility of  
313 their synapses to cargo in the pseudocoelom, or both.

314 Next, we targeted head neurons and a distinct set of cholinergic motor neurons, namely  
315 the SAB class, located proximal to the pharynx that innervates the head muscles. In order to  
316 target nD<sup>A647</sup> to these neurons, we chose the promoter of the glutamate receptor family protein  
317 GLR-4(Feng et al., 2006), since this protein is known to be expressed in the head neurons and  
318 the SAB, VB and DA9 neurons(Brockie, Madsen, Zheng, Mellem, & Maricq, 2001; “glr-4 (gene)  
319 - WormBase : Nematode Information Resource,” n.d.; Hills, Brockie, & Maricq, 2004; Kratsios  
320 et al., 2015; Rothaug et al., 2014). When nD<sup>A647N</sup> (1  $\mu$ M) was introduced into the pseudocoelom  
321 of these nematodes, we observed that it localized in punctate structures arranged around the  
322 pharynx, corresponding to the putative synapses of head neurons expressing *glr-4*, and ventral  
323 neuromuscular synapses belonging to the SAB and VB neurons (**Figure 4e**). Again, just as in  
324 the previous case of the DA and DB neurons, the DA9 neurons at the tail of the worm did not  
325 show labelling, revealing that this method led to the preferential labelling of SAB and VB  
326 neurons. Taken together, our results show that DNA nanodevices can be targeted to synapses  
327 and/or retrogradely trafficking endosomes of specific neuron types expressing SNB-1::9E.

328 We then tested whether our method provides sub-cellular level precision in terms of  
329 targeting individual neurons. Therefore, we tested whether we could target a DNA nanodevice  
330 to neurons, and yet not allow neuronal entry, thereby keeping the DNA nanodevice

331 immobilized on the neuronal surface. We therefore genetically fused 9E to the ODR-2 protein  
332 and expressed it under the pan-neuronal *psnb-1* promoter (**Figure 4f**). ODR-2 is a GPI-  
333 anchored membrane-associated signalling protein that plays important roles in nematode  
334 chemotaxis(Chou, Bargmann, & Sengupta, 2001). ODR-2 is highly expressed in sensory  
335 neurons, motor neurons and interneurons, and is particularly enriched in axons(Gottschalk &  
336 Schafer, 2006). Using the *pha-1* selection strategy described earlier, we obtained transgenics  
337 stably expressing the ODR-2::9E chimera (**Figure 4a**). When these transgenics were injected  
338 with nD<sup>A647N</sup> (1  $\mu$ M), we observed that in all worms, the DNA nanodevice labels neurons  
339 corresponding to the ventral and the dorsal nerve cords (**Figure 4f**). In these transgenics, a  
340 near-uniform pattern of plasma membrane labelling was observed that is reminiscent of ODR-  
341 2 staining(Chou et al., 2001), and is in stark contrast to the punctate labelling that was  
342 observed in *psnb-1::snb-1::9E* worms (**Figure 4b**). Taken together, our experiments show that  
343 the synthetic receptor-ligand strategy shown here is generalizable to cell-surface membrane  
344 proteins and can be used to label specific membrane domains and/or endosomal  
345 compartments across neurons *in vivo*. Additionally, this design is applicable to a range of  
346 functional DNA nanostructures provided they harbour a d(ATAA) tag, opening up new avenues  
347 for the cell-specific application of DNA nanodevices in biological systems.

348

## 349 **Conclusion**

350 Endocytosis and endosome trafficking are complex processes, regulating many critical  
351 cellular functions and therefore play pivotal roles in tissue-specific physiology and pathology.  
352 Our knowledge of subcellular dynamics and organization of endocytic and recycling pathways  
353 stems largely from investigations in cultured cellular systems. However, *in vivo*, endocytosis in  
354 single cells and their functional outcomes are sculpted by molecular interactions with their  
355 neighbouring cells, occurring in the presence of multiple biochemical cues originating from  
356 other tissues. Thus, the ability to study endocytic pathways *in vivo*, at the single cell level and  
357 in their native context, would illuminate our understanding of this core cellular process at the  
358 whole organism level.

359 There is now a rich repertoire of investigative tools based on DNA nanodevices that  
360 either probe or manipulate endosomal trafficking pathways(Krishnan et al., 2020). However,  
361 in order to tap the full potential of DNA-based nanodevices *in vivo*, it is essential to develop  
362 strategies for precise targeting to specific tissues. Here, we leverage both endogenous as well  
363 as synthetic nucleic acid-binding receptors to specifically target simple DNA nanodevices to  
364 two kinds of tissues: intestinal epithelial cells and neurons in *C. elegans*.

365 Our results show that, unlike what has been observed for coelomocytes(Chakraborty  
366 et al., 2017; Dan et al., 2019; Narayanaswamy et al., 2019; Surana et al., 2011; Veetil et al.,  
367 2017), simply introducing DNA nanodevices into the worm intestine and circumventing the

368 relevant biological barrier, does not lead to nanodevice targeting to intestinal epithelial cells.  
369 This is due to the lack of an appropriate intestinal epithelial cell surface receptor for DNA.  
370 However, by exploiting the endogenous dsRNA receptor SID-2 in intestinal epithelial cells, we  
371 could target DNA nanodevices to these cells. We achieved this by conjugating a dsRNA  
372 domain to DNA nanodevices, where the dsRNA domain engaged the SID-2 receptor such that  
373 the DNA nanodevice underwent receptor-mediated endocytosis and was subsequently  
374 trafficked to lysosome related organelles (LRO). Furthermore, since mutations in the *sid-2*  
375 gene, but not *sid-1*, abrogated DNA nanodevice uptake, we could pinpoint that nanodevice  
376 targeting occurs via the endogenous SID-2 receptor. Our results show that DNA nanodevices  
377 can be targeted tissue-specifically by exploiting relevant endogenously expressed cell-surface  
378 receptors and displaying the cognate ligand on the DNA nanodevice. Should new knowledge  
379 of cell type-specific nucleic acid receptors, this strategy could be used to expand the targeting  
380 of DNA nanodevices to other classes of cells.

381 In the absence of such knowledge, we have developed a synthetic receptor-ligand  
382 strategy to target DNA nanodevices in a generalisable way so that it can be adapted to a  
383 variety of cellular and molecular contexts *in vivo*. We therefore identified a sequence-specific,  
384 DNA-binding recombinant camelid antibody, denoted 9E, by phage display. 9E binds a specific  
385 4-nt sequence, namely d(ATAA) when it is present at the 3' end of the DNA nanodevice with  
386 high affinity (~200 nM), irrespective of the environmental pH.

387 By fusing 9E to proteins that are expressed on the target cell under appropriate tissue-  
388 specific promoters, we can target DNA nanodevices with cellular and sub-cellular level  
389 precision. For example, since SNB-1 is ubiquitously expressed in all neurons, we expressed a  
390 SNB-1::9E fusion protein under the pan-neuronal promoter *psnb-1* and targeted a DNA  
391 nanodevice displaying the 3' terminal d(ATAA) sequence, specifically to neurons. Interestingly,  
392 nanodevices labelled endosomes not only at the synapses but all along the axon within the  
393 relevant neurons. Neuronal targeting required both, SNB-1 fused to the 9E antibody and the  
394 DNA nanodevice to have the 3' d(ATAA) sequence. This established that cell-specific targeting  
395 was contingent upon the interaction between the synthetic receptor and its cognate DNA  
396 epitope. DNA nanodevices could be targeted to specific sub-sets of neurons by expressing the  
397 SNB-1::9E chimera under promoters of genes expressed in specific neuronal classes. Thus,  
398 when SNB-1::9E was expressed under *pacr-2* or *pglr-4* promoters(Feng et al., 2006; Kratsios  
399 et al., 2015, 2011), DNA nanodevices were internalized by cholinergic ventral cord neurons or  
400 SAB head motor neurons respectively.

401 We showed that targeting of DNA nanodevices could be achieved with sub-cellular  
402 level precision using this strategy. Fusing 9E to the transmembrane odorant receptor, ODR-2,  
403 which does not undergo significant endocytosis(Chou et al., 2001), enabled the immobilization  
404 of a DNA nanodevice at the neuronal surface, rather than being endocytosed into intracellular

405 vesicles. This suggests that DNA nanodevices may be localized with subcellular precision  
406 using a synthetic receptor and cognate ligand strategy *in vivo*.

407 To interrogate organelle dynamics and function *in vivo*, the development of robust  
408 technologies with molecular specificity that enables access to discrete cell types is critical. The  
409 modular system described here has the capability to interface with and harness, the power of  
410 nucleic acid nanotechnology to probe and program specific tissues *in vivo*. These targeting  
411 strategies open up an array of possible applications where DNA nanodevices can be readily  
412 applied in the multicellular context, and positions DNA nanodevices to deliver key insights into  
413 complex biological phenomena.

414

#### 415 **Acknowledgements**

416 We thank the Integrated Light Microscopy facility at the University of Chicago and the  
417 Caenorhabditis Genetic Center (CGC) funded by NIH Office of Research Infrastructure  
418 Programs (P40 OD010440) for strains. This work was supported by the University of Chicago  
419 Women's Board; FA9550-19-0003 from AFOSR (YK), NIH grants 1R01NS112139-01A1 (YK),  
420 the Ono Pharma Foundation Breakthrough Science Award (YK) and a Whitehall Foundation  
421 Grant 2017-12-50 (PK).

422

423 **Author Contribution:** SS, KC, SPK, PK and YK designed the project. SS, SM, FP and YK  
424 developed and characterized the recombinant 9E. KC and SM made constructs for transgenic  
425 development. KC, JA and PK developed all new transgenics. KC developed all the DNA  
426 nanodevices, performed biochemical assays, worm imaging and analysis. KC and YK  
427 analyzed the data. KC, SS and YK wrote the paper. All authors discussed the results and gave  
428 inputs on the manuscript.

429

430 **Competing interests:** The authors declare no competing interests.

431

#### 432 **Data availability**

433 The data that support the plots within this paper and other finding of this study are available  
434 from the corresponding author upon reasonable request.

435



## 436 Bibliography

- 437 Altun, Z. F., & Hall, D. H. (2009). Alimentary system, intestine. . *WormAtlas*. Retrieved from  
438 <http://doi:10.3908/wormatlas.1.4>
- 439 Altun-Gultekin, Z., Andachi, Y., Tsalik, E. L., Pilgrim, D., Kohara, Y., & Hobert, O. (2001). A  
440 regulatory cascade of three homeobox genes, *ceh-10*, *ttx-3* and *ceh-23*, controls cell  
441 fate specification of a defined interneuron class in *C. elegans*. *Development*, *128*(11),  
442 1951–1969.
- 443 Antibodies, M., Phage, B. Y., & Technology, D. (1994). MAKING ANTIBODIES BY PHAGE.
- 444 Bhatia, D., Arumugam, S., Nasilowski, M., Joshi, H., Wunder, C., Chambon, V., ... Krishnan,  
445 Y. (2016). Quantum dot-loaded monofunctionalized DNA icosahedra for single-  
446 particle tracking of endocytic pathways. *Nature Nanotechnology*, *11*(12), 1112–1119.  
447 doi:10.1038/nnano.2016.150
- 448 Bhatia, D., Surana, S., Chakraborty, S., Koushika, S. P., & Krishnan, Y. (2011). A synthetic  
449 icosahedral DNA-based host-cargo complex for functional in vivo imaging. *Nature*  
450 *Communications*, *2*, 339. doi:10.1038/ncomms1337
- 451 Brockie, P. J., Madsen, D. M., Zheng, Y., Mellem, J., & Maricq, A. V. (2001). Differential  
452 expression of glutamate receptor subunits in the nervous system of *Caenorhabditis*  
453 *elegans* and their regulation by the homeodomain protein UNC-42. *The Journal of*  
454 *Neuroscience*, *21*(5), 1510–1522.
- 455 Bujold, K. E., Lacroix, A., & Sleiman, H. F. (2018). DNA Nanostructures at the Interface with  
456 Biology. *Chem*, *4*(3), 495–521. doi:10.1016/j.chempr.2018.02.005
- 457 Chakraborty, K., Leung, K., & Krishnan, Y. (2017). High luminal chloride in the lysosome is  
458 critical for lysosome function. *eLife*, *6*, e28862. doi:10.7554/eLife.28862
- 459 Chakraborty, K., Veetil, A. T., Jaffrey, S. R., & Krishnan, Y. (2016). Nucleic Acid-Based  
460 Nanodevices in Biological Imaging. *Annual Review of Biochemistry*, *85*, 349–373.  
461 doi:10.1146/annurev-biochem-060815-014244
- 462 Chou, J. H., Bargmann, C. I., & Sengupta, P. (2001). The *Caenorhabditis elegans* *odr-2* gene  
463 encodes a novel Ly-6-related protein required for olfaction. *Genetics*, *157*(1), 211–  
464 224.
- 465 Coburn, C., & Gems, D. (2013). The mysterious case of the *C. elegans* gut granule: death  
466 fluorescence, anthranilic acid and the kynurenine pathway. *Frontiers in genetics*, *4*,  
467 151. doi:10.3389/fgene.2013.00151
- 468 Dan, K., Veetil, A. T., Chakraborty, K., & Krishnan, Y. (2019). DNA nanodevices map  
469 enzymatic activity in organelles. *Nature Nanotechnology*, *14*(3), 252–259.  
470 doi:10.1038/s41565-019-0365-6
- 471 Dell'Angelica, E. C., Mullins, C., Caplan, S., & Bonifacino, J. S. (2000). Lysosome-related  
472 organelles. *The FASEB Journal*, *14*(10), 1265–1278. doi:10.1096/fasebj.14.10.1265
- 473 Dittman, J., & Ryan, T. A. (2009). Molecular circuitry of endocytosis at nerve terminals.  
474 *Annual Review of Cell and Developmental Biology*, *25*, 133–160.  
475 doi:10.1146/annurev.cellbio.042308.113302
- 476 Douglas, S. M., Bachelet, I., & Church, G. M. (2012). A logic-gated nanorobot for targeted  
477 transport of molecular payloads. *Science*, *335*(6070), 831–834.  
478 doi:10.1126/science.1214081
- 479 Dumoulin, M., Conrath, K., Van Meirhaeghe, A., Meersman, F., Heremans, K., Frenken, L.  
480 G. J., ... Matagne, A. (2002). Single-domain antibody fragments with high  
481 conformational stability. *Protein Science*, *11*(3), 500–515. doi:10.1110/ps.34602
- 482 Ewert, S., Cambillau, C., Conrath, K., & Plückthun, A. (2002). Biophysical properties of  
483 camelid V(HH) domains compared to those of human V(H)3 domains. *Biochemistry*,  
484 *41*(11), 3628–3636. doi:10.1021/bi011239a
- 485 Feng, Z., Li, W., Ward, A., Piggott, B. J., Larkspur, E. R., Sternberg, P. W., & Xu, X. Z. S.  
486 (2006). A *C. elegans* model of nicotine-dependent behavior: regulation by TRP-family  
487 channels. *Cell*, *127*(3), 621–633. doi:10.1016/j.cell.2006.09.035
- 488 *glr-4* (gene) - WormBase : Nematode Information Resource. (n.d.). Retrieved January 7,  
489 2021, from [https://wormbase.org/species/c\\_elegans/gene/WBGene00001615#0-9f31-](https://wormbase.org/species/c_elegans/gene/WBGene00001615#0-9f31-10)  
490 10

- 491 Gottschalk, A., & Schafer, W. R. (2006). Visualization of integral and peripheral cell surface  
492 proteins in live *Caenorhabditis elegans*. *Journal of Neuroscience Methods*, *154*(1-2),  
493 68–79. doi:10.1016/j.jneumeth.2005.11.016
- 494 Granato, M., Schnabel, H., & Schnabel, R. (1994). pha-1, a selectable marker for gene  
495 transfer in *C. elegans*. *Nucleic Acids Research*, *22*(9), 1762–1763.  
496 doi:10.1093/nar/22.9.1762
- 497 Haberland, M. E., & Fogelman, A. M. (1985). Scavenger receptor-mediated recognition of  
498 maleyl bovine plasma albumin and the demaleylated protein in human monocyte  
499 macrophages. *Proceedings of the National Academy of Sciences of the United States*  
500 *of America*, *82*(9), 2693–2697.
- 501 Hamers-Casterman, C., Atarhouch, T., Muyldermans, S., Robinson, G., Hamers, C., Songa,  
502 E. B., ... Hamers, R. (1993). Naturally occurring antibodies devoid of light chains.  
503 *Nature*, *363*(6428), 446–448. doi:10.1038/363446a0
- 504 Hanson, P. I., Heuser, J. E., & Jahn, R. (1997). Neurotransmitter release - four years of  
505 SNARE complexes. *Current Opinion in Neurobiology*, *7*(3), 310–315.  
506 doi:10.1016/S0959-4388(97)80057-8
- 507 Harmsen, M. M., & De Haard, H. J. (2007). Properties, production, and applications of  
508 camelid single-domain antibody fragments. *Applied Microbiology and Biotechnology*,  
509 *77*(1), 13–22. doi:10.1007/s00253-007-1142-2
- 510 Hermann, G. J., Schroeder, L. K., Hieb, C. A., Kershner, A. M., Rabbitts, B. M., Fonarev, P.,  
511 ... Priess, J. R. (2005). Genetic analysis of lysosomal trafficking in *Caenorhabditis*  
512 *elegans*. *Molecular Biology of the Cell*, *16*(7), 3273–3288. doi:10.1091/mbc.E05-01-  
513 0060
- 514 Hills, T., Brockie, P. J., & Maricq, A. V. (2004). Dopamine and glutamate control area-  
515 restricted search behavior in *Caenorhabditis elegans*. *The Journal of Neuroscience*,  
516 *24*(5), 1217–1225. doi:10.1523/JNEUROSCI.1569-03.2004
- 517 Huizing, M., Helip-Wooley, A., Westbroek, W., Gunay-Aygun, M., & Gahl, W. A. (2008).  
518 Disorders of lysosome-related organelle biogenesis: clinical and molecular genetics.  
519 *Annual Review of Genomics and Human Genetics*, *9*, 359–386.  
520 doi:10.1146/annurev.genom.9.081307.164303
- 521 Hulme, S. E., & Whitesides, G. M. (2011). Chemistry and the worm: *Caenorhabditis elegans*  
522 as a platform for integrating chemical and biological research. *Angewandte Chemie*,  
523 *50*(21), 4774–4807. doi:10.1002/anie.201005461
- 524 Hunter, C. P., Winston, W. M., Molodowitch, C., Feinberg, E. H., Shih, J., Sutherlin, M., ...  
525 Fitzgerald, M. C. (2006). Systemic RNAi in *Caenorhabditis elegans*. *Cold Spring*  
526 *Harbor Symposia on Quantitative Biology*, *71*, 95–100. doi:10.1101/sqb.2006.71.060
- 527 Jani, M. S., Zou, J., Veetil, A. T., & Krishnan, Y. (2020). A DNA-based fluorescent probe  
528 maps NOS3 activity with subcellular spatial resolution. *Nature Chemical Biology*,  
529 *16*(6), 660–666. doi:10.1038/s41589-020-0491-3
- 530 Jewett, J. C., Sletten, E. M., & Bertozzi, C. R. (2010). Rapid Cu-free click chemistry with  
531 readily synthesized biarylazacyclooctynones. *Journal of the American Chemical*  
532 *Society*, *132*(11), 3688–3690. doi:10.1021/ja100014q
- 533 Jose, A. M., & Hunter, C. P. (2007). Transport of sequence-specific RNA interference  
534 information between cells. *Annual Review of Genetics*, *41*, 305–330.  
535 doi:10.1146/annurev.genet.41.110306.130216
- 536 Kerk, S. Y., Kratsios, P., Hart, M., Mourao, R., & Hobert, O. (2017). Diversification of  
537 *c. elegans* motor neuron identity via selective effector gene repression. *Neuron*,  
538 *93*(1), 80–98. doi:10.1016/j.neuron.2016.11.036
- 539 Kratsios, P., Pinan-Lucarré, B., Kerk, S. Y., Weinreb, A., Bessereau, J.-L., & Hobert, O.  
540 (2015). Transcriptional coordination of synaptogenesis and neurotransmitter  
541 signaling. *Current Biology*, *25*(10), 1282–1295. doi:10.1016/j.cub.2015.03.028
- 542 Kratsios, P., Stolfi, A., Levine, M., & Hobert, O. (2011). Coordinated regulation of cholinergic  
543 motor neuron traits through a conserved terminal selector gene. *Nature*  
544 *Neuroscience*, *15*(2), 205–214. doi:10.1038/nn.2989

- 545 Krishnan, Y., & Bathe, M. (2012). Designer nucleic acids to probe and program the cell.  
546 *Trends in Cell Biology*, 22(12), 624–633. doi:10.1016/j.tcb.2012.10.001
- 547 Krishnan, Y., Zou, J., & Jani, M. S. (2020). Quantitative imaging of biochemistry in situ and at  
548 the nanoscale. *ACS central science*, 6(11), 1938–1954.  
549 doi:10.1021/acscentsci.0c01076
- 550 Lee, H., Lytton-Jean, A. K. R., Chen, Y., Love, K. T., Park, A. I., Karagiannis, E. D., ...  
551 Anderson, D. G. (2012). Molecularly self-assembled nucleic acid nanoparticles for  
552 targeted in vivo siRNA delivery. *Nature Nanotechnology*, 7(6), 389–393.  
553 doi:10.1038/nnano.2012.73
- 554 Li, J., Pei, H., Zhu, B., Liang, L., Wei, M., He, Y., ... Fan, C. (2011). Self-assembled  
555 multivalent DNA nanostructures for noninvasive intracellular delivery of  
556 immunostimulatory CpG oligonucleotides. *ACS Nano*, 5(11), 8783–8789.  
557 doi:10.1021/nn202774x
- 558 Li, W., Koutmou, K. S., Leahy, D. J., & Li, M. (2015). Systemic RNA Interference Deficiency-  
559 1 (SID-1) Extracellular Domain Selectively Binds Long Double-stranded RNA and Is  
560 Required for RNA Transport by SID-1. *The Journal of Biological Chemistry*, 290(31),  
561 18904–18913. doi:10.1074/jbc.M115.658864
- 562 Mahoney, T. R., Liu, Q., Itoh, T., Luo, S., Hadwiger, G., Vincent, R., ... Nonet, M. L. (2006).  
563 Regulation of synaptic transmission by RAB-3 and RAB-27 in *Caenorhabditis*  
564 *elegans*. *Molecular Biology of the Cell*, 17(6), 2617–2625. doi:10.1091/mbc.E05-12-  
565 1170
- 566 Maxfield, F. R. (2014). Role of endosomes and lysosomes in human disease. *Cold Spring*  
567 *Harbor Perspectives in Biology*, 6(5), a016931. doi:10.1101/cshperspect.a016931
- 568 McEwan, D. L., Weisman, A. S., & Hunter, C. P. (2012). Uptake of extracellular double-  
569 stranded RNA by SID-2. *Molecular Cell*, 47(5), 746–754.  
570 doi:10.1016/j.molcel.2012.07.014
- 571 McGhee, J. D. (2007). The *C. elegans* intestine. *Wormbook: the Online Review of C.*  
572 *Elegans Biology*, 1–36. doi:10.1895/wormbook.1.133.1
- 573 Mellman, I., & Yarden, Y. (2013). Endocytosis and cancer. *Cold Spring Harbor Perspectives*  
574 *in Biology*, 5(12), a016949. doi:10.1101/cshperspect.a016949
- 575 Modi, S., M G, S., Goswami, D., Gupta, G. D., Mayor, S., & Krishnan, Y. (2009). A DNA  
576 nanomachine that maps spatial and temporal pH changes inside living cells. *Nature*  
577 *Nanotechnology*, 4(5), 325–330. doi:10.1038/nnano.2009.83
- 578 Modi, S., Nizak, C., Surana, S., Halder, S., & Krishnan, Y. (2013). Two DNA nanomachines  
579 map pH changes along intersecting endocytic pathways inside the same cell. *Nature*  
580 *Nanotechnology*, 8(6), 459–467. doi:10.1038/nnano.2013.92
- 581 Mukherjee, S., Ghosh, R. N., & Maxfield, F. R. (1997). Endocytosis. *Physiological Reviews*,  
582 77(3), 759–803. doi:10.1152/physrev.1997.77.3.759
- 583 Murthy, K., Bhat, J. M., & Koushika, S. P. (2011). In vivo imaging of retrogradely transported  
584 synaptic vesicle proteins in *Caenorhabditis elegans* neurons. *Traffic*, 12(1), 89–101.  
585 doi:10.1111/j.1600-0854.2010.01127.x
- 586 Narayanaswamy, N., Chakraborty, K., Saminathan, A., Zeichner, E., Leung, K., Devany, J., &  
587 Krishnan, Y. (2019). A pH-correctable, DNA-based fluorescent reporter for organellar  
588 calcium. *Nature Methods*, 16(1), 95–102. doi:10.1038/s41592-018-0232-7
- 589 Nguyen, J. P., Shipley, F. B., Linder, A. N., Plummer, G. S., Liu, M., Setru, S. U., ... Leifer, A.  
590 M. (2016). Whole-brain calcium imaging with cellular resolution in freely behaving  
591 *Caenorhabditis elegans*. *Proceedings of the National Academy of Sciences of the*  
592 *United States of America*, 113(8), E1074–81. doi:10.1073/pnas.1507110112
- 593 Nonet, M. L. (1999). Visualization of synaptic specializations in live *C. elegans* with synaptic  
594 vesicle protein-GFP fusions. *Journal of Neuroscience Methods*, 89(1), 33–40.  
595 doi:10.1016/s0165-0270(99)00031-x
- 596 Pereira, L., Kratsios, P., Serrano-Saiz, E., Sheftel, H., Mayo, A. E., Hall, D. H., ... Hobert, O.  
597 (2015). A cellular and regulatory map of the cholinergic nervous system of *C.*  
598 *elegans*. *eLife*, 4. doi:10.7554/eLife.12432

- 599 Pérez, J. M., Renisio, J. G., Prompers, J. J., van Platerink, C. J., Cambillau, C., Darbon, H.,  
600 & Frenken, L. G. (2001). Thermal unfolding of a llama antibody fragment: a two-state  
601 reversible process. *Biochemistry*, *40*(1), 74–83. doi:10.1021/bi0009082
- 602 Rizzoli, S. O. (2014). Synaptic vesicle recycling: steps and principles. *The EMBO Journal*,  
603 *33*(8), 788–822. doi:10.1002/embj.201386357
- 604 Rothaug, M., Zunke, F., Mazzulli, J. R., Schweizer, M., Altmepfen, H., Lüllmann-Rauch, R.,  
605 ... Blanz, J. (2014). LIMP-2 expression is critical for  $\beta$ -glucocerebrosidase activity and  
606  $\alpha$ -synuclein clearance. *Proceedings of the National Academy of Sciences of the*  
607 *United States of America*, *111*(43), 15573–15578. doi:10.1073/pnas.1405700111
- 608 Saha, S., Prakash, V., Halder, S., Chakraborty, K., & Krishnan, Y. (2015). A pH-independent  
609 DNA nanodevice for quantifying chloride transport in organelles of living cells. *Nature*  
610 *Nanotechnology*, *10*(7), 645–651. doi:10.1038/nnano.2015.130
- 611 Saminathan, A., Devany, J., Veetil, A. T., Suresh, B., Pillai, K. S., Schwake, M., & Krishnan,  
612 Y. (2020). A DNA-based voltmeter for organelles. *Nature Nanotechnology*.  
613 doi:10.1038/s41565-020-00784-1
- 614 Schroeder, L. K., Kremer, S., Kramer, M. J., Currie, E., Kwan, E., Watts, J. L., ... Hermann,  
615 G. J. (2007). Function of the *Caenorhabditis elegans* ABC transporter PGP-2 in the  
616 biogenesis of a lysosome-related fat storage organelle. *Molecular Biology of the Cell*,  
617 *18*(3), 995–1008. doi:10.1091/mbc.e06-08-0685
- 618 Seeman, N. C., & Sleiman, H. F. (2017). DNA nanotechnology. *Nature Reviews Materials*,  
619 *3*(1), 17068. doi:10.1038/natrevmats.2017.68
- 620 Sharma, S., Zaveri, A., Visweswariah, S. S., & Krishnan, Y. (2014). A fluorescent nucleic  
621 acid nanodevice quantitatively images elevated cyclic adenosine monophosphate in  
622 membrane-bound compartments. *Small (Germany)*, *10*(21), 4276–4280.  
623 doi:10.1002/smll.201400833
- 624 Soukas, A. A., Carr, C. E., & Ruvkun, G. (2013). Genetic regulation of *Caenorhabditis*  
625 *elegans* lysosome related organelle function. *PLoS Genetics*, *9*(10), e1003908.  
626 doi:10.1371/journal.pgen.1003908
- 627 Stefanakis, N., Carrera, I., & Hobert, O. (2015). Regulatory Logic of Pan-Neuronal Gene  
628 Expression in *C. elegans*. *Neuron*, *87*(4), 733–750. doi:10.1016/j.neuron.2015.07.031
- 629 Südhof, T. C. (1995). The synaptic vesicle cycle: a cascade of protein-protein interactions.  
630 *Nature*, *375*(6533), 645–653. doi:10.1038/375645a0
- 631 Surana, S., Bhat, J. M., Koushika, S. P., & Krishnan, Y. (2011). An autonomous DNA  
632 nanomachine maps spatiotemporal pH changes in a multicellular living organism.  
633 *Nature Communications*, *2*, 340. doi:10.1038/ncomms1340
- 634 Teschendorf, D., & Link, C. D. (2009). What have worm models told us about the  
635 mechanisms of neuronal dysfunction in human neurodegenerative diseases?  
636 *Molecular Neurodegeneration*, *4*, 38. doi:10.1186/1750-1326-4-38
- 637 Thekkan, S., Jani, M. S., Cui, C., Dan, K., Zhou, G., Becker, L., & Krishnan, Y. (2019). A  
638 DNA-based fluorescent reporter maps HOCl production in the maturing phagosome.  
639 *Nature Chemical Biology*, *15*(12), 1165–1172. doi:10.1038/s41589-018-0176-3
- 640 van der Linden, R. H., Frenken, L. G., de Geus, B., Harmsen, M. M., Ruuls, R. C., Stok, W.,  
641 ... Verrips, C. T. (1999). Comparison of physical chemical properties of llama VHH  
642 antibody fragments and mouse monoclonal antibodies. *Biochimica et Biophysica*  
643 *Acta*, *1431*(1), 37–46. doi:10.1016/s0167-4838(99)00030-8
- 644 Veetil, A. T., Chakraborty, K., Xiao, K., Minter, M. R., Sisodia, S. S., & Krishnan, Y. (2017).  
645 Cell-targetable DNA nanocapsules for spatiotemporal release of caged bioactive  
646 small molecules. *Nature Nanotechnology*, *12*(12), 1183–1189.  
647 doi:10.1038/nnano.2017.159
- 648 Veetil, A. T., Zou, J., Henderson, K. W., Jani, M. S., Shaik, S. M., Sisodia, S. S., ... Krishnan,  
649 Y. (2020). DNA-based fluorescent probes of NOS2 activity in live brains. *Proceedings*  
650 *of the National Academy of Sciences of the United States of America*, *117*(26),  
651 14694–14702. doi:10.1073/pnas.2003034117

- 652 Winston, W M, Molodowitch, C., & Hunter, C. P. (2002). Systemic RNAi in *C. elegans*  
653 requires the putative transmembrane protein SID-1. *Science*, 295(5564), 2456–2459.  
654 doi:10.1126/science.1068836
- 655 Winston, William M, Sutherlin, M., Wright, A. J., Feinberg, E. H., & Hunter, C. P. (2007).  
656 *Caenorhabditis elegans* SID-2 is required for environmental RNA interference.  
657 *Proceedings of the National Academy of Sciences of the United States of America*,  
658 104(25), 10565–10570. doi:10.1073/pnas.0611282104
- 659 Zhao, Y.-X., Shaw, A., Zeng, X., Benson, E., Nyström, A. M., & Högberg, B. (2012). DNA  
660 origami delivery system for cancer therapy with tunable release properties. *ACS*  
661 *Nano*, 6(10), 8684–8691. doi:10.1021/nn3022662
- 662
- 663

## Supplementary Information for:

### Tissue specific targeting of DNA nanodevices in a multicellular living organism.

Kasturi Chakraborty<sup>1,2</sup>, Sunaina Surana<sup>1,2</sup>, Simona Martin<sup>1,2</sup>, Jihad Aburas<sup>3</sup>, Sandrine Moutel<sup>4</sup>,  
Franck Perez<sup>4</sup>, Sandhya P. Koushika<sup>5</sup>, Paschalis Kratsios<sup>2,3,\*</sup> and Yamuna Krishnan<sup>1,2,\*</sup>

<sup>1</sup>*Department of Chemistry, The University of Chicago, Chicago IL 60637*

<sup>2</sup>*Grossman Institute of Neuroscience, Quantitative Biology and Human Behavior, The University of Chicago, Chicago IL 60637*

<sup>3</sup>*Department of Neurobiology, The University of Chicago, Chicago IL 60637*

<sup>4</sup>*Dynamics of Intracellular Organization Laboratory, Institut Curie, PSL Research University, Sorbonne Université, Centre National de la Recherche Scientifique, UMR 144, Paris, France*

<sup>5</sup>*Department of Biological Sciences, Tata Institute of Fundamental Research, Mumbai, India*

**Oligonucleotides** All fluorescently labeled DNA oligonucleotides were HPLC-purified and obtained from IBA-GmbH (Germany) and IDT (Coralville, IA, USA). Unlabeled DNA oligonucleotides were purchased from IDT (Coralville, IA, USA). RNA was transcribed *in vitro* using a MEGAscript® T7 Kit (Invitrogen, USA). geneBlock fragments were obtained from IDT (Coralville, IA, USA)

Sequences of the various oligonucleotides used are listed below in Table 1.

**Preparation of oligonucleotide samples** All oligonucleotides were ethanol precipitated, dissolved in Milli-Q water, aliquoted as a 100  $\mu$ M stock and stored at -20°C. Concentration of each oligonucleotide was measured using UV absorbance at 260 nm.

An intestinal epithelial cell targeting probe consist of an azido labelled RNA duplex conjugated to a DBCO containing fluorophore or DNA duplex via copper free click chemistry<sup>1-3</sup>. A PCR fragment of 100 bp or 50 bp template with a T7 promoter site obtained from a plasmid DNA was used as a template for *in vitro* transcription using protocols suggested by the manufacturer (MEGAscript® T7 Kit, Invitrogen, USA). The ability of T7 RP to incorporate different 5'-modified guanosine analogues was utilized in transcriptional priming to label and specifically conjugate the 5'-terminus of transcripts<sup>4,5</sup>. for incorporating a 5'-azide reactive group. In the IVT reaction, 5'-azido-5'-deoxy guanosine (5'-N<sub>3</sub>G) is added in fourfold excess over GTP to prime transcriptions<sup>1</sup>. RNA formation was confirmed by gel electrophoresis (PAGE) (Figure S1). The transcript with the 5'-terminal azide (R-N<sub>3</sub>) is subsequently used in click reactions with a fluorophore or DNA strand containing a dibenzocyclooctyl (DBCO) group. The click conjugation is performed in 10 mM sodium acetate buffer pH 5.5. This conjugated strand was then annealed to the corresponding complementary strands heating at 90°C for 5 min, and then slowly cooling to room temperature at 5°C per 15 min.

A sample of duplex DNA for screening of DNA binding V<sub>H</sub>H was made by mixing the relevant DNA oligonucleotides in equimolar ratios, heating at 90°C for 5 min, and then slowly cooling to room temperature at 5°C per 15 min. This sample preparation was carried out with oligonucleotide concentrations of 5  $\mu$ M, in phosphate buffered saline (PBS) of pH 7.3, in the presence of 100 mM KCl. Samples were then equilibrated at 4°C overnight. Samples were used within 7 days of annealing.

Selective oligonucleotides were phosphorylated at their 5' end by incubating them with T4 polynucleotide kinase (PNK; New England Biolabs, USA). 2 nmoles of the oligonucleotide were mixed with 2  $\mu$ L of 10 $\times$  PNK buffer, 2  $\mu$ L of PNK (10 U/ $\mu$ L), 4  $\mu$ L of 1 mM ATP and the volume

was made up to 20  $\mu$ L. This reaction mix was incubated at 37°C for 1 h. Post-incubation, the enzyme was inactivated by incubating the mixture at 75°C for 15 min. The DNA was subsequently ethanol precipitated, re-suspended in Milli-Q water and quantified using UV absorbance. These were then used to prepare duplex DNA using the protocol mentioned above.

A sample of the neuronal targeting probe (nD<sup>A647N</sup>) was made by mixing the DNA oligonucleotides nD and nD' in equimolar ratios, heating at 90°C for 5 min, and then slowly cooling to room temperature at 5°C per 15 min. This sample preparation was carried out with oligonucleotide concentrations of 5  $\mu$ M, in 10 mM phosphate buffer of pH 7.4, in the presence of 100 mM KCl. Samples were then equilibrated at 4°C overnight.

**Preparation of helper phages** *Escherichia coli* strain TG1 grown in minimal media (M9 media) was inoculated 1:100 in 100 mL 2 $\times$ TY media and grown till OD<sub>600</sub> reached 0.2. 200  $\mu$ L of this culture was then transferred to tubes and infected with serial dilutions of 4 $\times$ 10<sup>11</sup> M13KO7 helper phage (with a minimum ratio of 1 bacterium per 20 helper phages, GE Healthcare, USA) (10<sup>-10</sup>, 10<sup>-11</sup>, 10<sup>-12</sup>, 10<sup>-13</sup>, 10<sup>-14</sup>). The tube was quickly transferred to a 37°C water bath and incubated for 30 min without shaking. 3 mL of H-Top agar was heated to 42°C and quickly poured to each tube. This was then poured on 2 $\times$ TY plates and incubated overnight at 37°C. The plaques obtained from each plate were inoculated in 3 mL of 2 $\times$ TY and grown till optical density at 600 nm (OD<sub>600</sub>) reaches 0.5. At this stage, the cultures were again infected with helper phage and incubated for 2 h at 37°C with shaking. This was diluted in 500 mL of 2 $\times$ TY media and incubated at 37°C for 1 h, after which kanamycin was added to a final concentration of 50  $\mu$ g/mL and the culture was incubated overnight at 37°C. The overnight culture was centrifuged at 10800 $\times$ g for 15 min and the supernatant was collected into a glass conical flask. This flask was transferred to ice and 100 mL ice cold polyethylene glycol/NaCl solution (30% PEG 8000 with 2.5 M NaCl) was added with constant shaking. The resulting mixture was kept on ice for 45 min. The solution became turbid and was centrifuged at 10800 $\times$ g for 30 min and the supernatant was discarded. The phage precipitate was re-suspended in 6 mL PBS containing 30% glycerol. This was filtered using a 0.45  $\mu$ m membrane filter (Merck Millipore, USA), aliquoted and stored at -80°C.

**Preparation of library** A 250  $\mu$ L aliquot of the glycerol stock library (4 $\times$ 10<sup>10</sup> clones/mL) was inoculated in 250 mL of 2 $\times$ TY containing 100  $\mu$ g/mL of ampicillin (Sigma-Aldrich, USA) and 1% glucose. This was incubated at 37°C till the OD<sub>600</sub> reached 0.5. 25 mL (containing 10<sup>10</sup> clones) of this culture was infected with an excess of helper phage M13KO7, with a minimum ratio of 1 bacterium per 20 helper phages. Care was taken that no pipetting or shaking was done. This was incubated for 30 min at 37°C, without agitation, in a water bath. The infected bacteria were centrifuged for 20 min at 4200 rpm, the pellet was re-suspended in 500 mL of 2 $\times$ TY with 100  $\mu$ g/mL ampicillin and 50  $\mu$ g/mL kanamycin without glucose, and incubated overnight at 30°C with shaking. The overnight culture was centrifuged at 10800 $\times$ g at 4°C for 10 min. 100 mL of ice cold PEG-NaCl solution was added to the supernatant of the centrifuged culture, such that the supernatant becomes cloudy. This was incubated for 1 h on ice at 4°C. The mixture was centrifuged for 30 min at 10800 $\times$ g at 4°C to pellet the phages. The PEG/NaCl solution was aspirated off carefully without disturbing the pellet. The pellet was re-suspended in 40 mL Milli-Q water, after which 8 mL of PEG/NaCl was added. The solution was swirled for efficient but gentle mixing and then allowed to stand on ice at 4°C for 20 min. The phages were centrifuged again at 10800 $\times$ g for 30 min. The PEG/NaCl supernatant was carefully removed. The pellet containing a purified library of phages was re-suspended in 5 mL cold PBS and centrifuged again for 10 min at 13000 rpm at 4°C to pellet cell debris and bacteria. This is used as input for the phage display screen. The rest is stored as aliquots at -80°C.

**Preparation of DNA conjugated magnetic beads** 150  $\mu$ L streptavidin-coupled magnetic Dynabeads (Invitrogen, USA) were washed 3 times in PBS supplemented with 0.1% Tween-20

(Sigma-Aldrich, USA) (PBST). After each wash, beads were collected using a magnet. 15  $\mu$ L of the B-RO3-CELL duplex (oligonucleotides Biotin-R-CELL+O3-CELL) was added to the washed magnetic beads and the volume of the reaction made up to 500  $\mu$ L with PBST, such that the final DNA concentration used for the screening is 50 nM. This was incubated on a rotator for 1 h. After 1 h, the DNA coated beads are washed in PBST 3 times and then suspended in 150  $\mu$ L of PBS. For each round of selection, 50  $\mu$ L aliquots of this DNA conjugated magnetic bead mix were used. The rest was stored at -20°C for future use.

**Selection of dsDNA binders using phage display method** The phage display screen was carried out using a previously described protocol 10, with some variations. Non-specific binders (in particular anti-streptavidin  $V_H$ Hs) were removed from the library by incubating  $V_H$ Hs displayed on the surface of phages with streptavidin-coated magnetic beads alone. 50  $\mu$ L of streptavidin coated magnetic beads were mixed with 100  $\mu$ L of the library (this input contains  $1.1 \times 10^{12}$  phages) and incubated for 30 min on a roller and another 30 min standing. Volume of this mix was made up to 1.5 mL with PBST supplemented with 0.6% non-fat milk (PBSTM). After 1 h, the beads containing streptavidin binders were pulled down using a magnet, while the supernatant containing the remainder of the library was added to 50  $\mu$ L of the DNA coated magnetic beads. This mix was incubated on a roller for 30 min and then left standing for 1.5 h. After 2 h, the beads were pulled down using a magnet, the PBSTM was removed, 1 mL of fresh PBSTM was added and the beads were fully re-suspended. This mix was added to a 15 mL polypropylene tube, which was pre-blocked with PBSTM (2% non-fat milk), and the volume made up to 10 mL using PBST. The beads were collected using a magnet for 5 min, the PBST was removed and fresh PBST was added. This was repeated 20 times, with a change of polypropylene tube every 5 washes. After the last wash, 1 mL of 100 mM triethylamine (TEA) was added to re-suspend and dissociate the phages from the beads; this was transferred to a tube and rocked for 7 min, after which the beads were collected using a magnet. 500  $\mu$ L of the supernatant was carefully added to a 500  $\mu$ L of 1 M Tris-Cl (pH 7.4) to neutralize it; the remaining 500  $\mu$ L was put back on the roller again for 7 min and the above steps were repeated. Finally, 200  $\mu$ L of 1 M Tris-Cl was added to the polypropylene tube and kept separately.

**Rescue and enrichment of possible DNA binders** The rescue and amplification of selected phage was done by infecting *E. coli* TG-1 bacteria with eluted phage. 750  $\mu$ L of the recovered phages were added to 9.25 mL of a TG1 culture (grown to an  $OD_{600}$  of 0.5 in 2 $\times$ TY media with 1% glucose) and incubated at 37°C for 30 min in a water bath without agitation. Simultaneously, 4 mL of the same TG1 culture was added to the last polypropylene tube and the infection protocol was repeated. Both the cultures were pooled to get 14 mL of infected TG1 culture. Of this, 3 dilutions of 1 mL each were made,  $10^{-1}$ ,  $10^{-2}$  and  $10^{-3}$ , and two volumes of each, 10  $\mu$ L and 100  $\mu$ L, were spread on 2 $\times$ TY plates containing 1% glucose and 100  $\mu$ g/mL ampicillin. These plates were used for calculation of phage output after the first round of selection. The remaining culture was spun down at 3300 rpm for 10 min at RT. The pellet was re-suspended in 1.5 mL 2 $\times$ TY, which was equally divided and plated on 3 large 2 $\times$ TY plates containing 1% glucose and 100  $\mu$ g/mL ampicillin. All plates were grown overnight at 37°C.

Colonies obtained on the large petri dishes were scraped off using 6 mL of 2 $\times$ TY supplemented with 30% glycerol. This scraped culture constitutes the input for Round 2 of screening. An aliquot of this culture was added to 100 mL of 2 $\times$ TY with 1% glucose and 100  $\mu$ g/mL ampicillin, such that  $OD_{600}$  of the inoculated culture was 0.05. This was incubated at 37°C till  $OD_{600}$  reaches 0.5. 10 mL was aliquoted into a fresh tube, helper phages were added (bacteria: helper phage = 1:20; at  $OD_{600}$  = 0.5, a 10 mL culture of *E. coli* contains  $4 \times 10^9$  bacteria) and the culture was incubated at 37°C in a water bath for 30 min without agitation. The culture was centrifuged at 3300 rpm for 10 min at RT, the pellet was re-suspended in 50 mL 2 $\times$ TY with 100  $\mu$ g/mL ampicillin and 50  $\mu$ g/mL kanamycin (without glucose) and incubated overnight at 30°C.



40 mL of the overnight culture was centrifuged at 10800×g at 4°C for 10 min. 8 mL of ice cold PEG-NaCl solution was added to the supernatant of the centrifuged culture, such that the supernatant becomes cloudy. This was incubated for 1 h on ice at 4°C. The mixture was centrifuged for 10 min at 10800×g at 4°C to pellet the phages. The PEG solution was aspirated off carefully without disturbing the pellet. The pellet was re-suspended in 2 mL cold PBS without introducing air bubbles. The phages were centrifuged again at 10800×g for 10 min. The supernatant was carefully removed. The pellet containing cell debris and bacteria was discarded, while the supernatant was used as input for Round 2 of selection. 500 µL dilutions of 10<sup>-9</sup>, 10<sup>-10</sup> and 10<sup>-11</sup> were also made with the recovered phages, introduced into TG1 bacteria (as described above) and spread on 2×TY plates containing 1% glucose and 100 µg/mL ampicillin to calculate input. This was done for 3 rounds of selection. Negative selection against streptavidin was done at each stage of selection to completely eliminate anti-streptavidin V<sub>H</sub>Hs.

After 3 rounds of screening, 80 clones each from Round 2 and 3 were selected for further characterization. Individual colonies were transferred to one well of a 2 mL deep 96-well plate (Greiner Bio-one, Germany) with 600 µL 2×TY containing 100 µg/mL ampicillin and 1% glucose, and grown overnight with shaking at 37°C. Glycerol was then added to a final concentration of 30% to make a master plate which was stored at -80°C.

**ELISA using phages** ELISA was performed using phages secreted in the media, each of which carries the V<sub>H</sub>H fused to a coat protein. 600 µL of 2×TY with 100 µg/mL ampicillin and 1% glucose were added to each well of 2 mL deep 96 well plates, each of which was inoculated with 6 µL of the master stock. This was incubated for 2.5 h at 37°C with shaking, such that OD<sub>600</sub> reaches 0.5. Helper phages were added to each well and the plates were incubated at 37°C without agitation. The plates were then centrifuged at 2500 rpm for 5 min. The supernatant was carefully aspirated off and the pellet re-suspended in 600 µL 2×TY containing 100 µg/mL ampicillin and 50 µg/mL kanamycin. The plates were incubated overnight at 30°C with agitation. The phages were recovered by centrifuging the cultures at 2800 rpm for 10 min at RT and pipetting the supernatant in fresh 96 well plates.

In order to perform the ELISA, 96 well ELISA plates (Nunc Maxisorp, Thermo Fisher Scientific, USA) were coated with 50 µL of 20 µg/mL avidin and incubated at RT for 2 h. The plates were flicked and washed once with PBS to remove excess avidin. 50 µL of biotinylated DNA at 50 nM concentration was immobilized by adding it to the wells and incubating at 4°C overnight. Excess DNA was removed by flicking the plates. The plates were blocked using 200 µL of and kept at RT for 1 h, after which it was removed by flicking. In a separate plate, 90 µL of phages were mixed with 20 µL of PBSTM, incubated at RT for 20 min and then 100 µL of this mix was added to the ELISA plate. The phages and DNA were allowed to bind for 2 h, after which the plates were flicked and washed 3 times each with PBST and PBS. 50 µL of anti-M13 antibody conjugated to horseradish peroxidase (HRP; GE Healthcare Life Sciences, USA) was added at a 1:5000 dilution and incubated for 40 min. The plates were flicked and washed 3 times with PBST and PBS. 100 µL of tetramethyl benzidine (TMB)/H<sub>2</sub>O<sub>2</sub> (BD Biosciences, USA) was added to each well, and the reaction was stopped by addition of 100 µL of 2 N H<sub>2</sub>SO<sub>4</sub>. Binding was quantified by measuring absorbance at 450 nm using a Spectramax multi-mode plate reader (Molecular Devices, USA).

**ELISA using secreted V<sub>H</sub>Hs** ELISA was performed using V<sub>H</sub>Hs secreted in the media. 600 µL of 2×TY with 100 µg/mL ampicillin and 1% glucose was added to each well of 2 mL deep 96 well plates, each of which was inoculated with 6 µL of the master stock. This was incubated for 2 h at 37°C with shaking, after which 1 mM isopropyl thiogalactoside (IPTG) was added. The plates were then shifted to 30°C and incubated overnight. The cultures were centrifuged at 2800 rpm for 10 min at RT and the supernatant, which contains secreted V<sub>H</sub>Hs, was carefully transferred to a fresh 96 well plate. After this, standard ELISA, as outlined in Section IV.B.8.1 was carried out,

using mouse anti-Myc antibody (Sigma- Aldrich, USA) at a dilution of 1:1500 and goat anti-mouse antibody conjugated to HRP (Life Technologies, USA) at a dilution of 1:1000.

**Characterization of sequence specificity** Approximately 80 colonies each from Round 2 and Round 3 of selection were screened by ELISA against the dsDNA of choice (Biotin-R-CELL+O3-CELL). This screening was done using both phage and protein ELISA, as described above. In order to check the sequence specificity of the positive clones, V<sub>H</sub>Hs were subjected to another round of ELISA assay against various DNA epitopes. The epitopes used were ssDNA (Biotin-R-CELL, Biotin-O3-CELL), dsDNA (Biotin-R-CELL+O3-CELL), divergent dsDNA (Biotin-DS1-CELL+DS2-CELL) and various parts of the dsDNA (Biotin-R-CELL+R1-CELL, Biotin-R-CELL+RM-CELL, Biotin-R-CELL+R2-CELL, Biotin-R-CELL+R3-CELL, Biotin-R-CELL+R4-CELL, Biotin-R-CELL+R5-CELL). After immobilization of these targets, ELISA assay was carried out as mentioned above.

**Sequencing of specific clones** About 42 clones showing binding to dsDNA were chosen for sequencing. Individual clones were grown overnight and subjected to a plasmid DNA isolation using Nucleospin Plasmid Miniprep Kit (Macherey-Nagel GmbH, Germany). Sequencing was performed using a standard dideoxy sequencing method.

**Expression and purification of V<sub>H</sub>Hs** V<sub>H</sub>H expression was performed in M9 minimal media (1× M9 salts, 2 mM MgSO<sub>4</sub>, 1% glycerol, 0.1% casamino acids and 0.000005% thiamine). Selected V<sub>H</sub>H was inoculated in 100 mL 2×TY supplemented with 100 µg/mL ampicillin and 1% glucose and grown overnight at 37°C. 5 ml of this culture was inoculated in 500 mL of M9 minimal media with 100 µg/mL ampicillin and grown at 37°C for 2 h. IPTG was added to a final concentration of 1 mM, after which the culture was shaken at 30°C for 16 h. Bacteria were centrifuged at 10000 rpm for 10 min. The supernatant containing secreted V<sub>H</sub>Hs was filtered using a 0.22 µm membrane filter to remove the remaining debris. The filtered media was then incubated with 2 mL of Talon Cobalt affinity resin (Clontech Laboratories Inc., USA) for 1 h at 4°C. Post-binding, the media with the resin was put into a funnel adapted onto a column, which was pre-washed with 20 mL of PBS, at 4°C. The flow through was collected and again passed through the column in order to collect all the metal beads with bound protein. This was done 3 times. Once all the beads were collected, they were washed again by passing 100 mL of PBS through the column. Non-specific binding to beads was abrogated using 1 mL 5 mM imidazole. The bound V<sub>H</sub>H was then eluted using a gradient of imidazole concentrations, ranging from 50 mM to 250 mM. The first 9 fractions were run on a 12% SDS-PAGE to check the expression and elution of the protein.

Each eluted V<sub>H</sub>H was further purified by removing imidazole using a 10 kDa Amicon ultra centrifugal filter (Merck Millipore, USA). Each fraction was added to the centrifugal filter and centrifuged for 10 min at 4°C for 14000 rpm. Volumes were then made up to 400 µL using PBS after each spin. This was repeated 10 times. Concentration of each fraction was measured using Bradford assay. Purified V<sub>H</sub>H were stored at 4°C for short term and at - 20°C for long term.

**pH dependent ELISA** pH dependent ELISA to check pH sensitivity of the selected V<sub>H</sub>H was performed using purified V<sub>H</sub>H. The V<sub>H</sub>H solution was divided into two pools and each pool was incubated with PBSTM of the desired pH for 20 min. This was then added to ELISA plates containing the immobilized DNA of choice. Standard ELISA, as described above, was then employed to assess binding.

**Determination of V<sub>H</sub>H binding affinities** Affinity of selected V<sub>H</sub>Hs for their dsDNA epitopes was assessed using 3 formats, as described below. All data was analyzed using OriginPro 8.5 (OriginLab, USA).

*i) Using serial dilutions of immobilized DNA* Avidin coated 96-well plates were incubated with serial dilutions of the dsDNA antigen (10 nM - 5  $\mu$ M), as described in Section IV.B.8. 250 nM of the protein was added and allowed to bind for 2 h. ELISA was then carried out as described above.

*ii) Using serial dilutions of competitive DNA* 500 nM of the biotinylated dsDNA antigen was mixed with serial dilutions of competitor non-biotinylated dsDNA (1 nM - 25  $\mu$ M), to which 100 nM of protein was added. This mixture was allowed to incubate for 2 h at RT, after which it was added to avidin coated 96-well plates and further incubated for 2 h. ELISA was then performed.

*iii) Using serial dilutions of purified V<sub>H</sub>H* Avidin coated 96-well plates were incubated and bound with 500 nM of the dsDNA antigen as described in Section IV.B.8. Serial dilutions of the protein (1 nM - 5  $\mu$ M) were added and allowed to bind for 2 h. ELISA was then carried performed.

**Electrophoretic mobility shift assay** The required dsDNA constructs were annealed, as described above, at concentrations of 5  $\mu$ M. A binding reaction was set up consisting of 1  $\mu$ M DNA and 1  $\mu$ M protein in PBS. Glycerol was added to a final concentration of 10% in order to minimize DNA-protein complex dissociation. DNA-protein complexes were allowed to form at RT for 2 h, after which 50 pmoles of DNA were loaded on an 8% native PAGE. The gel was run at 4°C using Tris-acetate-EDTA (TAE) buffer at 100 V. The DNA-protein complexes were visualized using ethidium bromide staining.

**Plasmid vectors and construction of 9E fusions.** PHA-1 plasmid (gift from Krastosis lab, University of Chicago) and pBluescript SK(-) (Agilent Technologies, USA) were used during construction of transgenic strains. PCR fragments containing promoters of choice, *snb-1* or *odr-2* and 9E were generated using standard cloning protocols. *psnb-1:odr-2* and *snb-1::9E* geneBlock fragments were obtained from IDT. *pglr-4*, *psnb-1*, 9E was cloned out of plasmids generated in house (*pglr-4*- Krastosis lab; *psnb-1* and 9E- Krishnan lab). *pacr-2* was cloned out of genomic DNA isolated from wild type worms. All the PCR fragments had a *unc-54* 3'UTR sequence on their 3' end for better expression in worms<sup>6</sup>.

**C. elegans methods and strains** Wild type strain used was the *Caenorhabditis elegans* isolate from Bristol (strain N2)<sup>7</sup>. Mutant strains used are VC1119 (*dyf-2&ZK520.2(gk505) III*), VC1521 (*dyf-2(gk678) III*), HC196 (*sid-1(qt9) V*). Other transgenics used for colocalization studies are as follows

1. *jsls682* [*prab-3::gfp::rab-3*]<sup>8,9</sup> expresses GFP::RAB-3 in all neurons.
2. *otls355* [*rab3p(prom1)::2xNLS::TagRFP*] which expresses RFP in the nucleus of all neurons<sup>10</sup>
3. *otls45* [*unc-119::GFP*] which expresses GFP in the cytosol of all neurons<sup>11</sup>
4. *pwls50* [*imp-1::GFP + Cbr-unc-119(+)*] which expresses LMP-1::GFP a lysosomal marker<sup>12</sup>.
5. *hjls9* [*ges-1p::glo-1::GFP + unc-119(+)*] in which GFP is targeted to lysosome related organelles (LROs) in intestinal cells<sup>13</sup>

All strains were procured from the *Caenorhabditis* Genetics Centre (CGC; University of Minnesota, USA). Standard methods were followed for the maintenance of *C. elegans*.

Transgenic strains were created by co-injecting PCR fragment of the gene of interest and PHA-1 plasmid (20 ng/ $\mu$ l) as a selectable marker in *pha-1* mutants<sup>14</sup>. The PCR fragments used in this study were *psnb-1:snb-1::9E* *psnb-1:odr-2::9E*; *pglr-4:snb-1::9E* and *pacr-2:snb-1::9E*. Total concentration of injected DNA was 100 ng/ $\mu$ l, which was achieved using empty pBluescript SK(-) vector. Transgenic lines obtained were also maintained using standard protocols. *pha-1* mutants

are temperature sensitive embryonic lethal mutants which can grow at 15°C but not 25 °C<sup>15</sup>. Each line was characterized based on the survival at 25 °C.

**Intestinal epithelia and neuron labelling** Intestinal labeling was done by soaking worms in a 10 µL, 1 µM solution of intestine targeting probe at pH 5.0 for 2 hours. Worms were then washed in PBS and placed on OP50 plates for another hour before imaging. Worms were mounted on 2.0% agarose pads and anesthetized using 40 mM sodium azide in M9 buffer.

Neuronal labelling was done by injecting 500 nM of nD<sup>A647N</sup>. Injections were performed, as previously described<sup>16</sup>, in the dorsal side in the pseudocoelom, just opposite the vulva, of one-day old adult wild type hermaphrodites. Injected worms were mounted on 2.0% agarose pads and anesthetized either using 40 mM sodium azide or 1mM levimasole in M9 buffer. Neuronal labeling was examined after 30- 60 minutes of incubation at 22°C. Imaging of labelled neurons was carried out in at least 15 worms.

**Co-localization experiments** For gut colocalization experiments ~10 one-day adult transgenic worms were incubated in a solution of 1 µM R<sup>100D38</sup> for two hours. Worms were then washed and incubated on OP50 plates for 1 hour for the clearing of the intestine lumen of excess sensor.

For neuronal co-localization experiments *psnb-1::snb-1::9E* were crossed with various transgenic lines containing fluorescently labelled neuronal markers. Briefly, L4 for hermaphrodite worms of various fluorescently labelled transgenic lines were crossed with N2 males and the male progeny containing a fluorescent label were selected for the next step. Fluorescently labeled male worms were crossed with *psnb-1::snb-1::9E* containing L4 hermaphrodites. 10-12 hermaphrodite progeny from this step were singled out at the L4 developmental stage based on the presence of a fluorescent marker. These worms were allowed to self-fertilize and 5 of their progenies were used to perform single worm PCRs to identify which plates contain worms with both 9E and the fluorescent neuronal markers. Single worm PCRs were performed using standard methods<sup>17</sup>. Briefly, 5 worms from each plate were placed into a tube containing 5µL of worm lysis buffer (WLB: 50 mM KCl, 10 mM Tris pH 8.3, 2.5 mM MgCl<sub>2</sub>, 0.8% Tween-20, 0.01% Gelatin) and 100 µg/ml proteinase K. Worms are frozen at -80°C for at least one hour. The tube is immediately treated at 60°C for 60min after which proteinase K is inactivated by heating to 95°C for 15min. The PCR mix is then added directly to the digested heat inactivated sample. The PCR product was then confirmed by gel electrophoresis for 9E. Actin was used as a control. Plates which showed the presence of *psnb-1::snb-1::9E* were taken forward for injecting the DNA device similar to protocols mentioned above.

Worms were mounted on 2.0% agarose pads and anesthetized using either 40 mM sodium azide or 1 mM levimasole in M9 buffer and imaged on Leica TCS SP5 II STED laser scanning confocal microscope (Leica Microsystems, Inc., Buffalo Grove, IL, USA) in confocal mode.

**Microscopy and image analysis** Confocal images were captured with a Leica TCS SP5 II STED laser scanning confocal microscope (Leica Microsystems, Inc., Buffalo Grove, IL, USA) equipped with 63X, 1.4 NA, oil immersion objective. Alexa 488 was excited using an Argon ion laser for 488 nm excitation, Alexa 647 using He-Ne laser for 633 excitation. Images on the same day were acquired under the same acquisition settings. All the images were background subtracted prior to any image analysis, which was carried out using ImageJ ver.1.49d (NIH, USA).

Image analysis for quantification of uptake during intestinal labeling was done using custom MATLAB code. For each worm the most focused plane was manually selected in the Alexa 647 channel. To determine the location of the endosome first a low threshold was used to select the entire field. Only the area within the cell was subsequently considered for vesicle selection. Regions of interest corresponding to individual vesicle were selected in the Alexa 647 channel by

adaptive thresholding using Sauvola's method <sup>18</sup>. The initial selection was further refined by watershed segmentation and size filtering. After segmentation regions of interest were inspected in each image and selection errors were corrected manually. Using this we measured the mean fluorescence intensity for ~500 vesicles from ~10 animals and the background intensity corresponding to that field was subtracted.

**Table 1. Sequences of oligonucleotides employed in this study.**

| Name                   | Sequences 5'-3'                                                                                                                                    |
|------------------------|----------------------------------------------------------------------------------------------------------------------------------------------------|
| R1 <sup>50</sup>       | GGA CTC TGG GGT TCG AAA TGA CCG ACC AAG CGA CGC CCA ACC TGC CAT CC                                                                                 |
| R2 <sup>50</sup>       | GGA TGG CAG GTT GGG CGT CGC TTG GTC GGT CAT TTC GAA CCC CAG AGT CC                                                                                 |
| R1 <sup>100</sup>      | GGA CTC TGG GGT TCG AAA TGA CCG ACC AAG CGA CGC CCA ACC TGC CAT CAC GAG<br>ATT TCG ATT CCA CCG CCG CCT TCT ATG AAA GGT TGG GCT TCG GAC C           |
| R2 <sup>100</sup>      | GGT CCG AAG CCC AAC CTT TCA TAG AAG GCG GCG GTG GAA TCG AAA TCT CGT GAT<br>GGC AGG TTG GGC GTC GCT TGG TCG GTC ATT TCG AAC CCC AGA GTC C           |
| D1 <sup>38</sup>       | DBCO-ATCAACACTGCACACCAGACAGCAAGATCCTATATATA                                                                                                        |
| D2 <sup>38</sup>       | Alexa 647-TATATATAGGATCTTGCTGTCTGGTGTGCAGTGTTGAT                                                                                                   |
| D1 <sup>50</sup>       | TAT CAG TAG GTT CTT CAG AGT ATT GTC TCT TCC GTG TAT CAG TTA GCC TC-DBCO                                                                            |
| D2 <sup>50</sup>       | Alexa 647-GAG GCT AAC TGA TAC ACG GAA GAG ACA ATA CTC TGA AGA ACC TAC TGA<br>TA                                                                    |
| D1 <sup>100</sup>      | TAT CAG TAG GTT CTT CAG AGT ATT GTC TCT TCC GTG TAT CAG TTA GCC TCG ACT<br>CTC ATA GTG GAC GTA GAA CTC CAC ATC AGA TCA CTG GAA GAT CAT C-DBCO      |
| D2 <sup>100</sup>      | Alexa 647-GAT GAT CTT CCA GTG ATC TGA TGT GGA GTT CTA CGT CCA CTA TGA GAG<br>TCG AGG CTA ACT GAT ACA CGG AAG AGA CAA TAC TCT GAA GAA CCT ACT GAT A |
| BIOTIN-R-CELL          | Biotin-AAA ATA CAT TTA TAT ATA TCC TAG TCC GAC CGC AGG ATC CTA TAA                                                                                 |
| R-CELL                 | TAC ATT TAT ATA TAT CCT AGT CCG ACC GCA GGA TCC TAT AA                                                                                             |
| BIOTIN-O3-CELL         | TTA TAG GAT CCT GCG GTC GGA CTA GGA TAT ATA TAA ATG TAA AAA-Biotin                                                                                 |
| O3-CELL                | TTA TAG GAT CCT GCG GTC GGA CTA GGA TAT ATA TAA ATG TA                                                                                             |
| R1-CELL                | TTA TAG GAT CCT GCG GT                                                                                                                             |
| RM-CELL                | GCG GTC GGA CTA GGA TA                                                                                                                             |
| R2-CELL                | GGA TAT ATA TAA ATG TA                                                                                                                             |
| R3-CELL                | AGG ATC CTG CCG TCG GA                                                                                                                             |
| R4-CELL                | TCC TGC GGT CCG ACT AG                                                                                                                             |
| R5-CELL                | GCG GTC GGA CTA GGA TA                                                                                                                             |
| BIOTIN-RR6-CELL        | Biotin-AAA ATA CAT TTA TAT ATA TCC TAG TCC ATA AGA CCG CAG GAT CCT                                                                                 |
| R6-CELL                | AGG ATC CTG CCG TCT TAT GGA CTA GGA TAT ATA TAA ATG TA                                                                                             |
| BIOTIN-R-CELL-33       | Biotin-AAAATACATTTCTAGTCCGACCGCAGGATCCTATAA                                                                                                        |
| O3-CELL-33             | TTATAGGATCCTGCGGTCCGACTAGGAAATGTA                                                                                                                  |
| BIOTIN-DS1-CELL        | Biotin-AAA ATG CAG GGT ACG GTA CCG TAC GCC GGA CGC GAC TAG TTA CGG                                                                                 |
| DS2-CELL               | CCG TAA CTA GTC GCG TCC GGC GTA CCG TAC CGT ACC CTG CA                                                                                             |
| I4-CELL                | CCC CTA ACC CCT AAC CCC TAA CCC CAT ATA TAT CCT AGA ACG ACA GAC AAA CAG<br>TGA TAA                                                                 |
| I4-COMP-CELL           | TTA TCA CTG TTT GTC TGT CGT TCT AGG ATA TAT ATT TTG TTA TGT GTT ATG TGT TAT                                                                        |
| nD'                    | AT CAA CAC TGC ACA CCA GAC AGC TAG GAT CCT ATA A                                                                                                   |
| nD <sup>647</sup>      | TTA TAG GA/iATTO647NN/ CCT AGC TGT CTG GTG TGC AGT GTT GAT                                                                                         |
| nD <sup>488</sup>      | Alexa488-AT CAA CAC TGC ACA CCA GAC AGC TAG GAT CCT ATA A                                                                                          |
| nD'-9E                 | TCA CAC TGC ACA CTA CAG ACA GCA AGA TCCA                                                                                                           |
| nD <sup>647N</sup> -9E | TGGA TCT TGC TGT CTG TAG TGT GCA GTG TGA                                                                                                           |

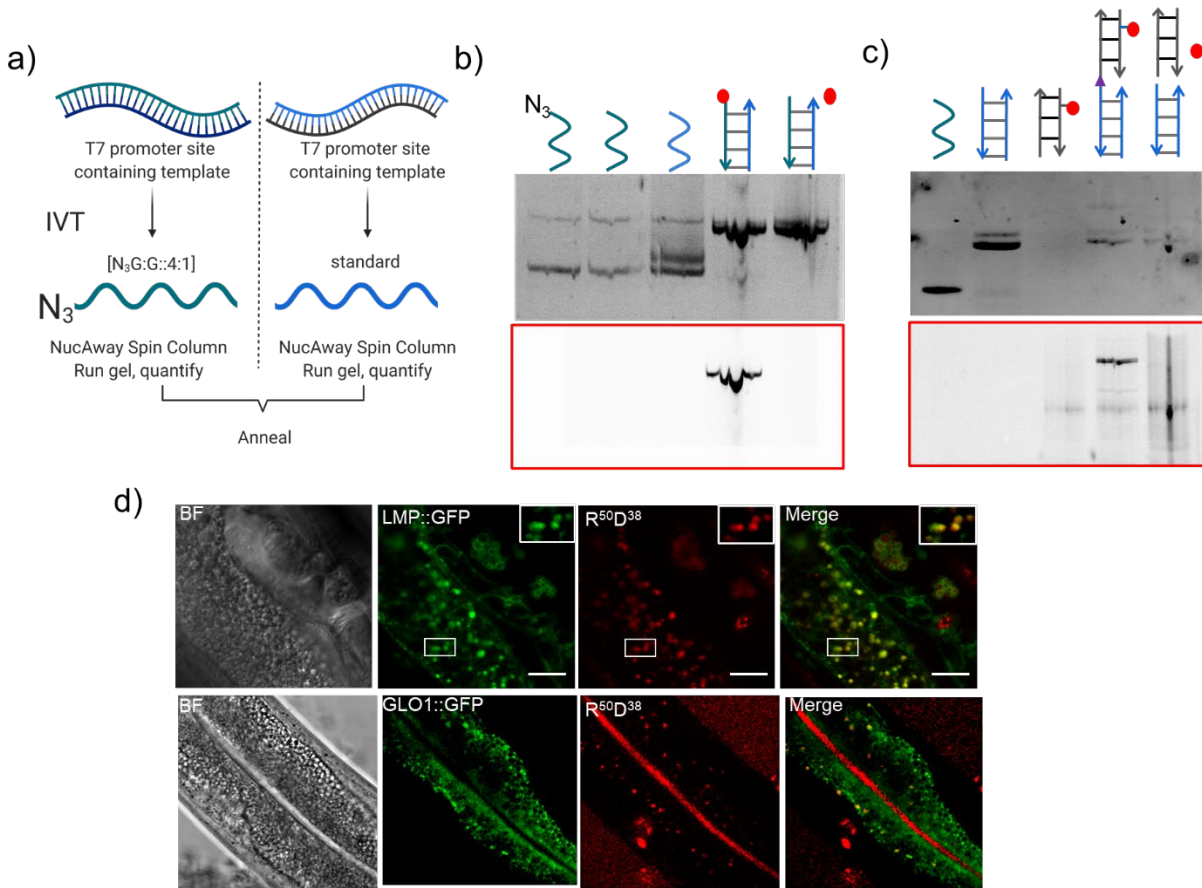

**Supplementary Fig1: Uptake of nucleic acid probes in the intestinal epithelial cells a)**

Schematic showing protocol of synthesis of azide labelled RNA for R<sup>50</sup> and R<sup>100</sup> strands. b) The conjugation of Alexa 647N was confirmed by gel electrophoresis for R<sup>50</sup>. The 8% Native PAGE gel was imaged in the EtBr channel and Alexa 647N channel (red box). c) The conjugation of R<sup>100</sup> (lane 2) with D<sup>38</sup> (lane 3) to form R<sup>100</sup>D<sup>38</sup> (lane 4) was confirmed by gel electrophoresis. The 15% Native PAGE gel was imaged in the EtBr channel. d) Representative images of colocalization between LRO markers (LMP1::GFP and GLO-1::GFP) and R<sup>100</sup>D<sup>38</sup> fluorophore labeled nucleic acid probes in intestinal epithelial cells.

To test whether our R<sup>n</sup>D<sup>n</sup> devices localized in LROs we performed colocalization experiments in transgenic worms expressing fluorescently labelled lysosomal markers LMP1::GFP or GLO-1::GFP that label lysosomes and LROs respectively. The transgenics were incubated in a solution of 1  $\mu$ M R<sup>100</sup>D<sup>38</sup> for 2 h. Worms were then washed and incubated on OP50 plates for 1 hour for clearing their intestine lumens of excess R<sup>100</sup>D<sup>38</sup>. Our experiments revealed that R<sup>100</sup>D<sup>38</sup> and LMP1::GFP showed high colocalization, indicating that the nanodevices labeled LROs. Similarly R<sup>100</sup>D<sup>38</sup> and GLO-1::GFP also colocalized. However, there was lower uptake into the IEC's and poorer clearance of the gut lumen in GLO-1::GFP transgenic worms.

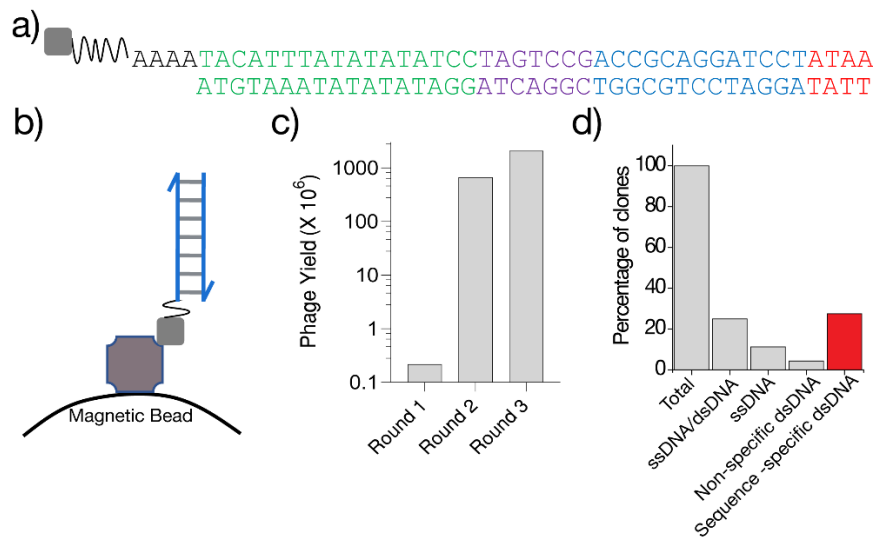

**Supplementary Figure 2: Analysis of recombinant antibody binders of a dsDNA epitope.** a) Sequence of the biotin-labeled dsDNA epitope used for the phage display screen. b) The epitope was immobilized via biotin (grey square) on streptavidin conjugated magnetic beads. c) Yield of the phages after each round of selection, calculated as described in Materials and Methods. d) Percentage of V<sub>H</sub>H clones obtained that bound the indicated epitope and their sequence specificity.

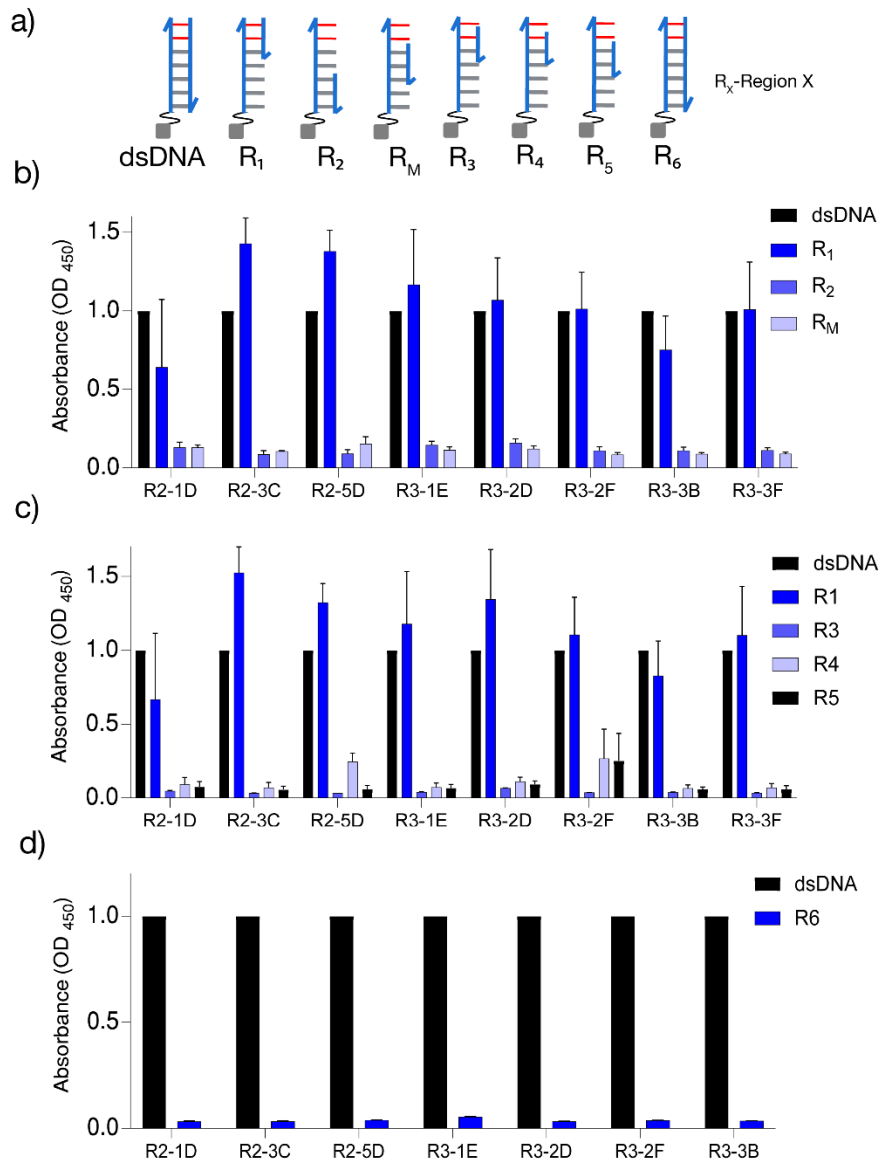

**Supplementary Figure 3: Characterization of dsDNA-binding V<sub>H</sub> antibodies.** a) Schematic of the dsDNA constructs used to find the minimal dsDNA-binding motif. All sequence details are provided in Supplementary Table 1. Epitopes were immobilized on streptavidin conjugated magnetic beads via biotin (grey square). Relative binding of a few representative dsDNA-binding V<sub>H</sub> antibodies to b) duplexes R<sub>1</sub>, R<sub>2</sub> and R<sub>M</sub>, c) duplexes R<sub>3</sub>, R<sub>4</sub> and R<sub>5</sub>, d) duplex R<sub>6</sub>. All ELISA experiments were performed in triplicate and errors are presented as mean ± s.e.m.



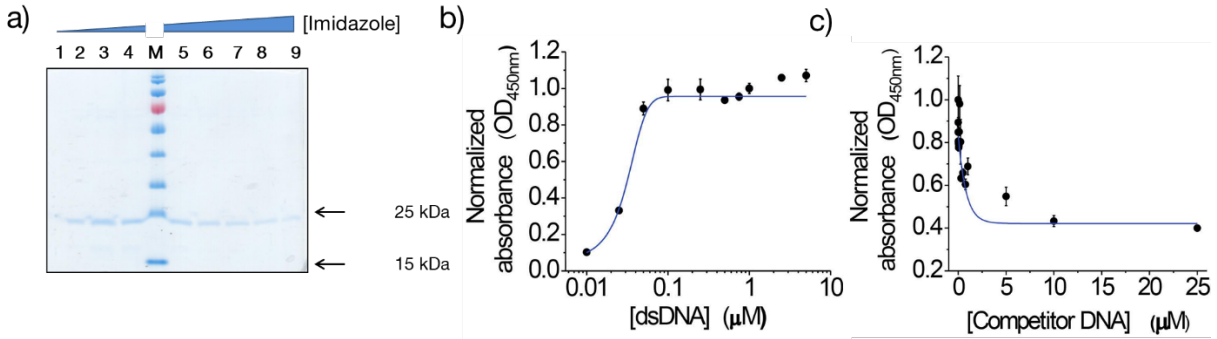

**Supplementary Figure 4:** a) Purification of the dsDNA-binding 9E. Clone 9E was expressed and purified as described in Materials and Methods, and the fractions obtained after elution using increasing concentrations of imidazole were resolved on a 12.5% SDS-polyacrylamide gel. Fractions 3-9 were found to be enriched in the eluted protein. Semi-quantitative determination of affinity of 9E for the 41-mer dsDNA using (b) increasing concentrations of immobilized dsDNA and fixed amount of protein (250 nM), and (c) immobilized dsDNA (500 nM) in the presence of increasing amounts of competitor dsDNA. All experiments were performed in triplicate and the data is represented as mean  $\pm$  s.e.m.

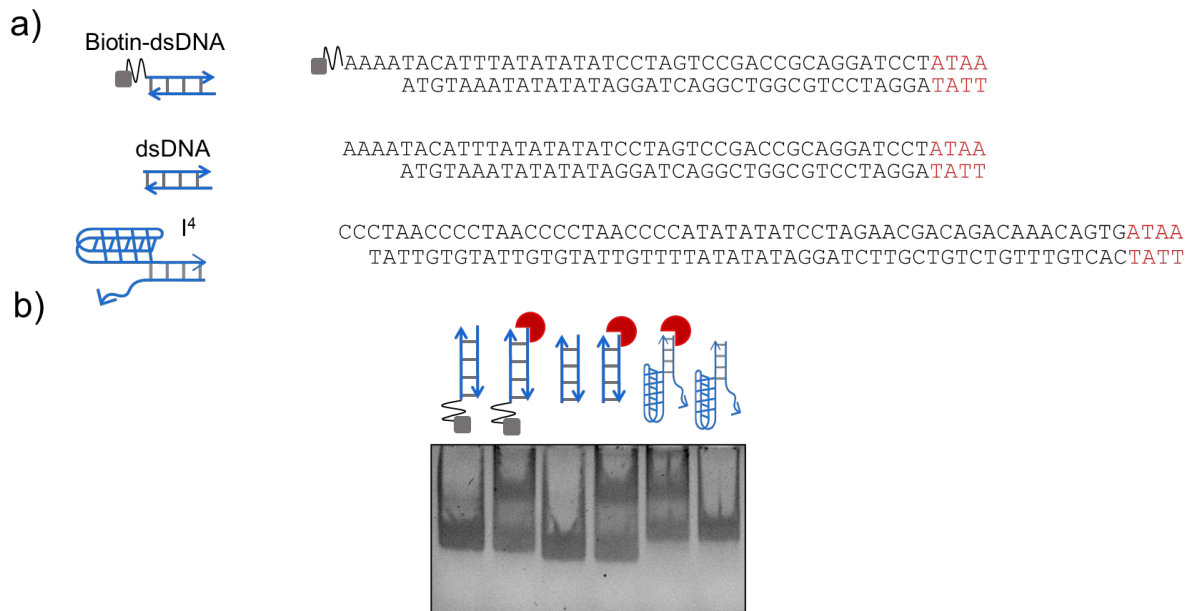

**Supplementary Figure 5. Electrophoretic mobility shift assay (EMSA) to demonstrate binding of 9E to the 4 nt minimal binding motif.** (a) Sequences, and the corresponding schematics, of DNA constructs engineered with the 4 nt epitope (red) to demonstrate binding of 9E. (b). EMSA of 9E (red crescent) to biotinylated dsDNA (lanes 1, 2), dsDNA (lanes 3, 4) and a DNA duplex (I<sup>4</sup>; lanes 5, 6) where the 4 nt epitope was placed at one end of the duplex (region highlighted in red), while the other end comprised an I-motif forming C-rich segment. Binding assays were set up as described in Materials and Methods and run on an 8% non-denaturing polyacrylamide-TAE gel.

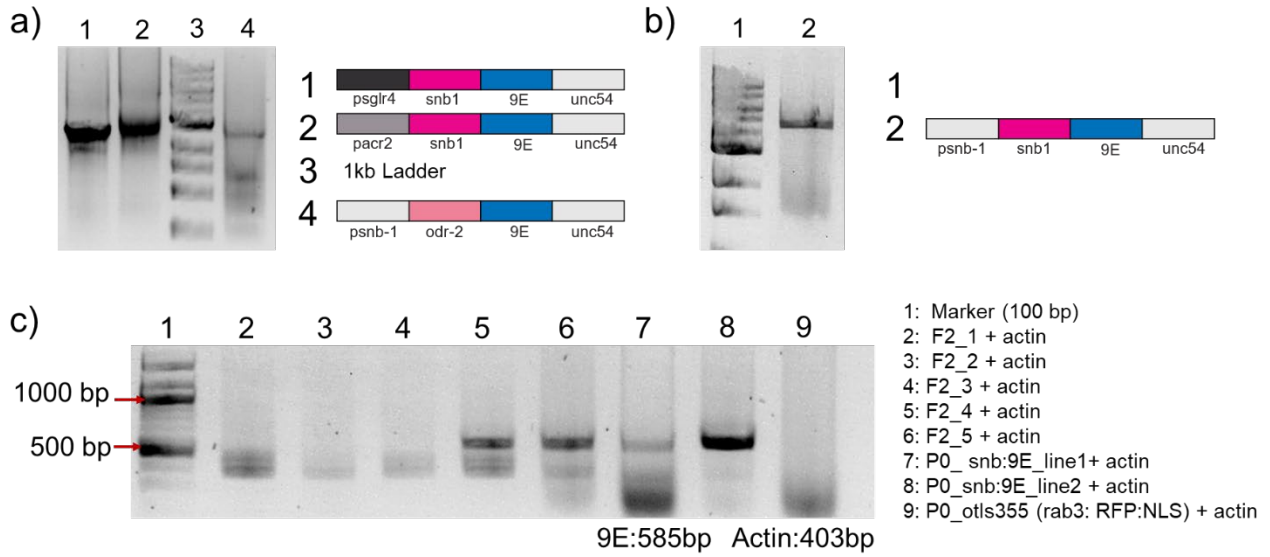

**Supplementary Figure 6:** a) and b) PCR fragments used for making various transgenic strains to target DNA probes to neurons. PCR product was confirmed by gel electrophoresis with 1% Agarose gel and c) single worm PCR showing selection of worms containing *psnb-1::9E* and *2XNLS::RFP*

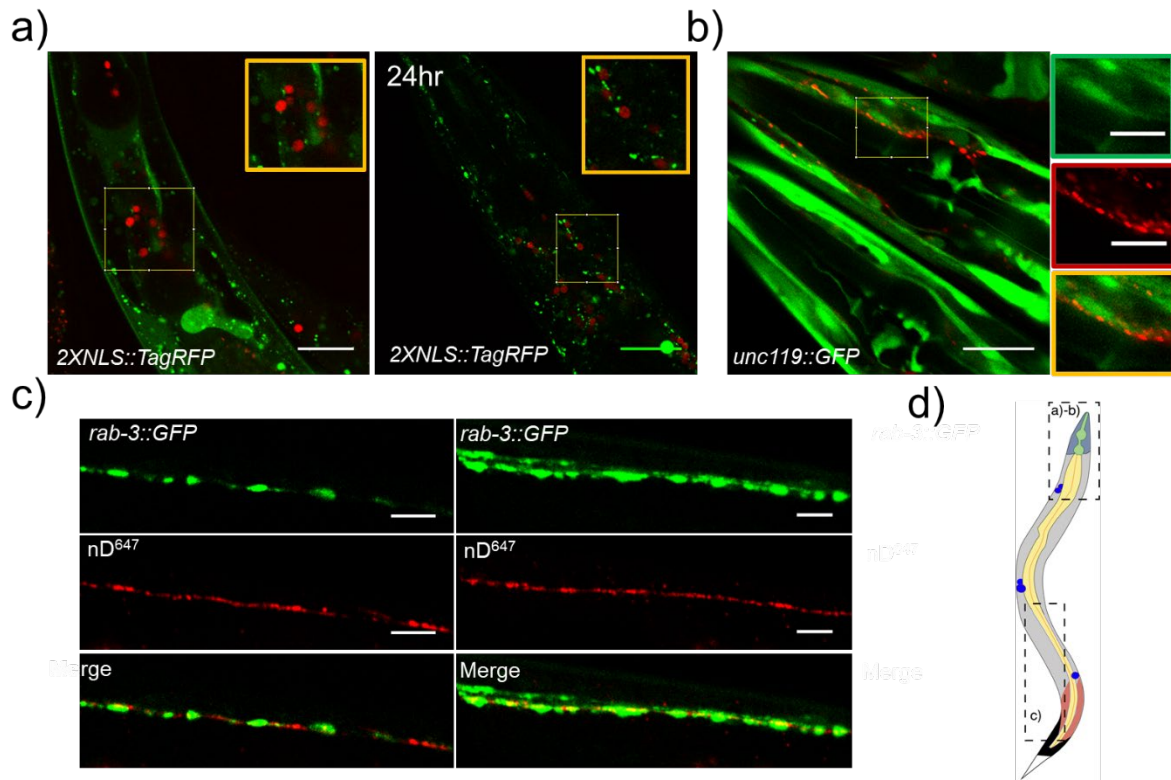

**Supplementary Figure 7: Schematic showing selection of worms containing *psnb-1::snb-1::9E* and *2XNLS::RFP*: Representative merged images of transgenic worms containing both a) *rab-3p(prom1)::2xNLS::TagRFP* or b) *unc-119::GFP* or c) *prab-3::gfp::rab-3* and *psnb-1::snb-1::9E* injected with nDNA. d) Schematic showing regions of the worm represented in a-c. Scale bar a) 20  $\mu\text{m}$ ; b) 20  $\mu\text{m}$ , inset- 5 $\mu\text{m}$  and c) 5 $\mu\text{m}$ .**

## Bibliography

1. Paredes, E. & Das, S. R. Click chemistry for rapid labeling and ligation of RNA. *Chembiochem* **12**, 125–131 (2011).
2. Jewett, J. C., Sletten, E. M. & Bertozzi, C. R. Rapid Cu-free click chemistry with readily synthesized biarylazacyclooctynones. *J. Am. Chem. Soc.* **132**, 3688–3690 (2010).
3. Baskin, J. M. *et al.* Copper-free click chemistry for dynamic in vivo imaging. *Proc. Natl. Acad. Sci. USA* **104**, 16793–16797 (2007).
4. Milligan, J. F., Groebe, D. R., Witherell, G. W. & Uhlenbeck, O. C. Oligoribonucleotide synthesis using T7 RNA polymerase and synthetic DNA templates. *Nucleic Acids Res.* **15**, 8783–8798 (1987).
5. Huang, F., He, J., Zhang, Y. & Guo, Y. Synthesis of biotin-AMP conjugate for 5' biotin labeling of RNA through one-step in vitro transcription. *Nat. Protoc.* **3**, 1848–1861 (2008).
6. Merritt, C., Rasoloson, D., Ko, D. & Seydoux, G. 3' UTRs are the primary regulators of gene expression in the *C. elegans* germline. *Curr. Biol.* **18**, 1476–1482 (2008).
7. Brenner, S. *Caenorhabditis elegans*. 71–94 (1974).
8. Mahoney, T. R. *et al.* Regulation of synaptic transmission by RAB-3 and RAB-27 in *Caenorhabditis elegans*. *Mol. Biol. Cell* **17**, 2617–2625 (2006).
9. Bounoutas, A., Zheng, Q., Nonet, M. L. & Chalfie, M. *mec-15* encodes an F-box protein required for touch receptor neuron mechanosensation, synapse formation and development. *Genetics* **183**, 607–17, 1SI (2009).
10. Nguyen, J. P. *et al.* Whole-brain calcium imaging with cellular resolution in freely behaving *Caenorhabditis elegans*. *Proc. Natl. Acad. Sci. USA* **113**, E1074–81 (2016).
11. Altun-Gultekin, Z. *et al.* A regulatory cascade of three homeobox genes, *ceh-10*, *ttx-3* and *ceh-23*, controls cell fate specification of a defined interneuron class in *C. elegans*. *Development* **128**, 1951–1969 (2001).
12. Treusch, S. *et al.* *Caenorhabditis elegans* functional orthologue of human protein h-mucolipin-1 is required for lysosome biogenesis. *Proc. Natl. Acad. Sci. USA* **101**, 4483–4488 (2004).
13. Zhang, S. O., Trimble, R., Guo, F. & Mak, H. Y. Lipid droplets as ubiquitous fat storage organelles in *C. elegans*. *BMC Cell Biol.* **11**, 96 (2010).
14. Mello, C. C., Kramer, J. M., Stinchcomb, D. & Ambros, V. Efficient maintenance. **10**, 3959–3970 (1991).
15. Granato, M., Schnabel, H. & Schnabel, R. *pha-1*, a selectable marker for gene transfer in *C. elegans*. *Nucleic Acids Res.* **22**, 1762–1763 (1994).
16. Stinchcomb, D. T., Shaw, J. E., Carr, S. H. & Hirsh, D. Extrachromosomal DNA transformation of *Caenorhabditis elegans*. *Mol. Cell. Biol.* **5**, 3484–3496 (1985).
17. Single worm PCR | Schedl Lab. at <<http://genetics.wustl.edu/tslab/protocols/genomic-stuff/single-worm-pcr/>>

18. Sauvola, J. & Pietikäinen, M. Adaptive document image binarization. *Pattern Recognit* **33**, 225–236 (2000).
